# Supplementary material for: Development of a water-soluble ouroboros-like calix[6]arene-trisimidazole-based ligand for enhanced binding of zinc
Source: Royal Society of Chemistry journal article supplement (doi:10.1039/d4dt03158j), 2024-11-19
Supplement: d4dt03158j1.pdf [file d4dt03158j1.pdf]

## Supporting information

to

### Development of a water-soluble ouroboros-like calix[6]arene-trisimidazole-based ligand for enhanced binding of zinc

*Romain Carpentier,<sup>&,£</sup> Roy Lavendomme,<sup>£,§</sup> Benoit Colasson,<sup>#</sup> Kristin Bartik,<sup>&,\*</sup> and Ivan Jabin<sup>£,\*</sup>*

<sup>&</sup> Université libre de Bruxelles (ULB), Ecole polytechnique de Bruxelles, Engineering of Molecular NanoSystems, Avenue F.D. Roosevelt 50, CP165/64, B-1050 Brussels, Belgium.

<sup>£</sup> Université libre de Bruxelles (ULB), Laboratoire de Chimie Organique, Avenue F.D. Roosevelt 50, CP160/06, B-1050 Brussels, Belgium.

<sup>§</sup> Université libre de Bruxelles (ULB), Laboratoire de Résonance Magnétique Nucléaire Haute Résolution, Avenue F.D. Roosevelt 50, CP160/08, B-1050 Brussels, Belgium.

<sup>#</sup> Université Paris Cité, CNRS, Laboratoire de Chimie et de Biochimie Pharmacologiques et Toxicologiques, F-75006 Paris, France.

[Kristin.Bartik@ulb.be](mailto:Kristin.Bartik@ulb.be), [Ivan.Jabin@ulb.be](mailto:Ivan.Jabin@ulb.be)

### Table of contents

|                                                                                                 |           |
|-------------------------------------------------------------------------------------------------|-----------|
| <b>Characterization of compound 2</b> .....                                                     | <b>S3</b> |
| <b>Figure S1:</b> <sup>1</sup> H NMR spectrum of <b>2</b> in DMSO-d <sub>6</sub> .....          | S3        |
| <b>Figure S2:</b> COSY NMR spectrum of <b>2</b> in DMSO-d <sub>6</sub> .....                    | S3        |
| <b>Figure S3:</b> <sup>13</sup> C NMR spectrum of <b>2</b> in DMSO-d <sub>6</sub> .....         | S4        |
| <b>Figure S4:</b> HSQC NMR spectrum of <b>2</b> in DMSO-d <sub>6</sub> .....                    | S4        |
| <b>Figure S5:</b> ATR-FTIR spectrum of <b>2</b> .....                                           | S5        |
| <b>Characterization of compound 3</b> .....                                                     | <b>S6</b> |
| <b>Figure S6:</b> <sup>1</sup> H NMR spectrum of <b>3</b> in DMSO-d <sub>6</sub> .....          | S6        |
| <b>Figure S7:</b> COSY NMR spectrum of <b>3</b> in DMSO-d <sub>6</sub> .....                    | S6        |
| <b>Figure S8:</b> <sup>13</sup> C NMR spectrum of <b>3</b> in DMSO-d <sub>6</sub> .....         | S7        |
| <b>Figure S9:</b> HSQC NMR spectrum of <b>3</b> in DMSO-d <sub>6</sub> .....                    | S7        |
| <b>Figure S10:</b> ATR-FTIR spectrum of <b>3</b> .....                                          | S8        |
| <b>Titrations for formation of the complexes in CDCl<sub>3</sub>/CD<sub>3</sub>CN 1:1</b> ..... | <b>S9</b> |
| <b>Figure S11:</b> titration with <b>2</b> and Zn(OTf) <sub>2</sub> .....                       | S9        |
| <b>Figure S12:</b> titration with <b>3</b> and Zn(OTf) <sub>2</sub> .....                       | S9        |

|                                                                                                                         |            |
|-------------------------------------------------------------------------------------------------------------------------|------------|
| <b>Characterization of complex 2-Zn<sup>2+</sup> in CDCl<sub>3</sub>/CD<sub>3</sub>CN 1:1</b> .....                     | <b>S10</b> |
| <b>Figure S13:</b> <sup>1</sup> H NMR spectrum of 2-Zn <sup>2+</sup> in CDCl <sub>3</sub> /CD <sub>3</sub> CN 1:1 ..... | S10        |
| <b>Figure S14:</b> COSY NMR spectrum of 2-Zn <sup>2+</sup> in CDCl <sub>3</sub> /CD <sub>3</sub> CN 1:1 .....           | S10        |
| <b>Figure S15:</b> HSQC NMR spectrum of 2-Zn <sup>2+</sup> in CDCl <sub>3</sub> /CD <sub>3</sub> CN 1:1 .....           | S11        |
| <b>Figure S16:</b> HMBC NMR spectrum of 2-Zn <sup>2+</sup> in CDCl <sub>3</sub> /CD <sub>3</sub> CN 1:1 .....           | S11        |
| <b>Characterization of complex 3-Zn<sup>2+</sup> in CDCl<sub>3</sub>/CD<sub>3</sub>CN 1:1</b> .....                     | <b>S12</b> |
| <b>Figure S17:</b> <sup>1</sup> H NMR spectrum of 3-Zn <sup>2+</sup> 1 .....                                            | S12        |
| <b>Figure S18:</b> COSY NMR spectrum of 3-Zn <sup>2+</sup> .....                                                        | S12        |
| <b>Figure S19:</b> <sup>13</sup> C NMR spectrum of 3-Zn <sup>2+</sup> .....                                             | S13        |
| <b>Figure S20:</b> HSQC NMR spectrum of 3-Zn <sup>2+</sup> .....                                                        | S13        |
| <b>Figure S21:</b> HMBC NMR spectrum of 3-Zn <sup>2+</sup> .....                                                        | S14        |
| <b>Figure S22:</b> ATR-FTIR spectrum of 3-Zn <sup>2+</sup> .....                                                        | S14        |
| <b>Figure S23:</b> EXSY experiment for 3-Zn <sup>2+</sup> .....                                                         | S15        |
| <b>Titrations for formation of the complexes in DMSO</b> .....                                                          | <b>S16</b> |
| <b>Figure S24:</b> titration with 2 and Zn(OTf) <sub>2</sub> .....                                                      | S16        |
| <b>Figure S25:</b> titration with 3 and Zn(OTf) <sub>2</sub> .....                                                      | S16        |
| <b>Formation and characterization of complex 4-Zn<sup>2+</sup> in CDCl<sub>3</sub>/CD<sub>3</sub>CN 1:1</b> .....       | <b>S17</b> |
| <b>Figure S26:</b> post-functionalization of 3-Zn <sup>2+</sup> upon addition of phenylisocyanate .....                 | S17        |
| <b>Figure S27:</b> <sup>1</sup> H NMR spectrum of 4-Zn <sup>2+</sup> .....                                              | S17        |
| <b>Figure S28:</b> COSY NMR spectrum of 4-Zn <sup>2+</sup> .....                                                        | S18        |
| <b>Figure S29:</b> HSQC NMR spectrum of 4-Zn <sup>2+</sup> .....                                                        | S18        |
| <b>Figure S30:</b> HMBC NMR spectrum of 4-Zn <sup>2+</sup> .....                                                        | S19        |
| <b>Competition experiments in CDCl<sub>3</sub>/CD<sub>3</sub>CN 1:1</b> .....                                           | <b>S20</b> |
| <b>Figure S31:</b> competition between 2-Zn <sup>2+</sup> and 3-Zn <sup>2+</sup> .....                                  | S20        |
| <b>Figure S32:</b> competition between HexNH <sub>2</sub> -2-Zn <sup>2+</sup> and 3-Zn <sup>2+</sup> .....              | S20        |
| <b>Figure S33:</b> competition between 3-Zn <sup>2+</sup> and 4-Zn <sup>2+</sup> .....                                  | S21        |
| <b>Characterization of complex 3-Zn<sup>2+</sup> in D<sub>2</sub>O</b> .....                                            | <b>S22</b> |
| <b>Figure S34:</b> <sup>1</sup> H NMR spectrum of 3-Zn <sup>2+</sup> .....                                              | S22        |
| <b>Figure S35:</b> COSY NMR spectrum of 3-Zn <sup>2+</sup> .....                                                        | S22        |
| <b>Figure S36:</b> HSQC NMR spectrum of 3-Zn <sup>2+</sup> .....                                                        | S23        |
| <b>Figure S37:</b> HMBC NMR spectrum of 3-Zn <sup>2+</sup> .....                                                        | S23        |
| <b>Figure S38:</b> EXSY experiment spectrum of 3-Zn <sup>2+</sup> .....                                                 | S24        |
| <b>Titrations for formation of the complexes in D<sub>2</sub>O</b> .....                                                | <b>S25</b> |
| <b>Figure S39:</b> titration with 3 and Zn(ClO <sub>4</sub> ) <sub>2</sub> .....                                        | S25        |
| <b>Figure S40:</b> pH optimization for 3-Zn <sup>2+</sup> .....                                                         | S26        |
| <b>Figure S41:</b> titration with 3 and Zn(OAc) <sub>2</sub> .....                                                      | S27        |

## Characterization of 2

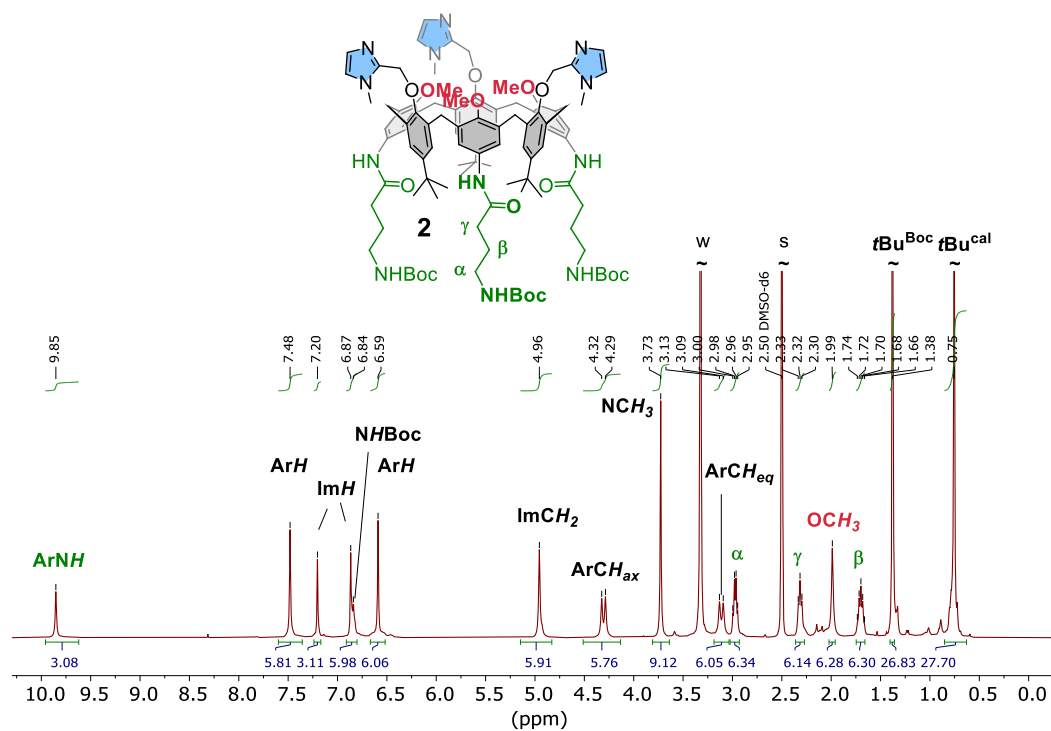

Figure S1.  $^1\text{H}$  NMR spectrum (298K, 400 MHz, DMSO- $d_6$ ) of **2**. s: residual solvent, w: water.

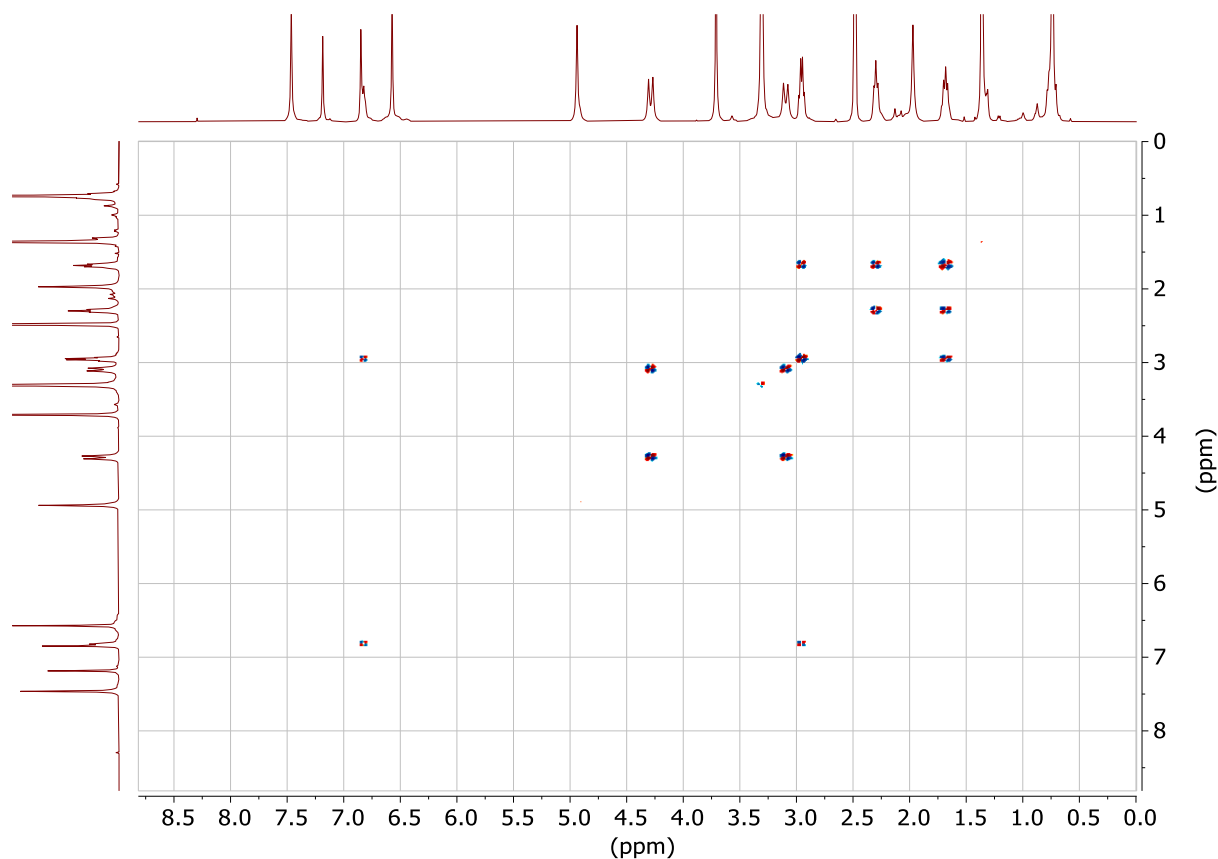

Figure S2. COSY NMR spectrum (298K, 400 MHz, DMSO- $d_6$ ) of **2**.

$^{13}\text{C}$  NMR characterization was attempted but only small signals could be detected after a prolonged analysis time and over 5000 scans (Figure S3). However, a HSQC spectrum allowed the assignment of some of the  $^{13}\text{C}$  signals (Figure S4).

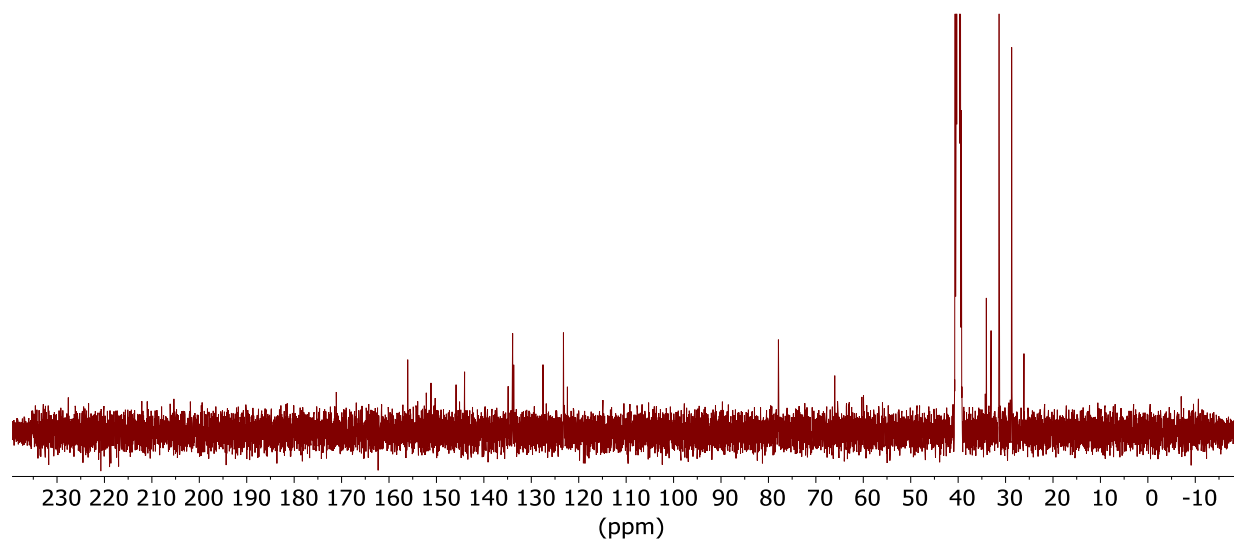

**Figure S3.**  $^{13}\text{C}$  NMR spectrum (298K, 400 MHz,  $\text{DMSO-}d_6$ ) of **2**.

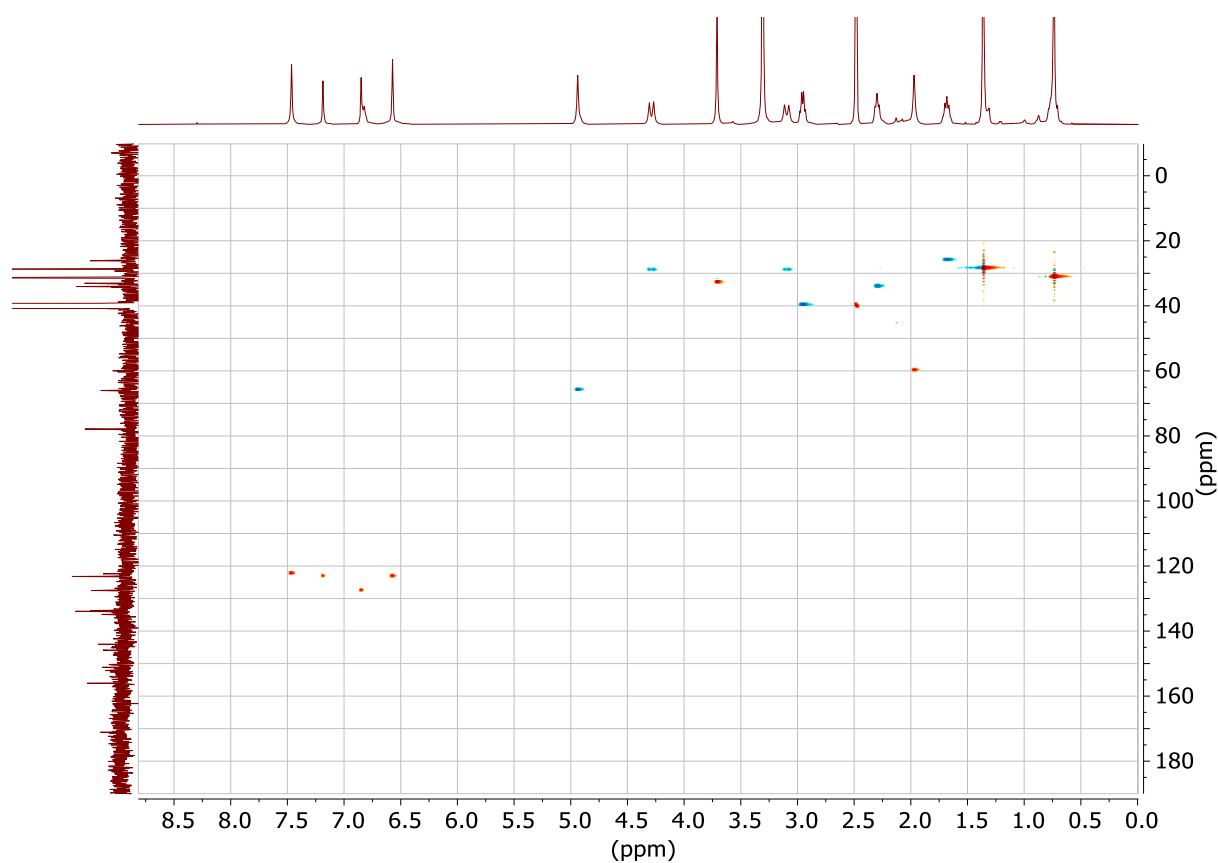

**Figure S4.** Edited HSQC NMR spectrum (298K, 400 MHz,  $\text{DMSO-}d_6$ ) of **2**.

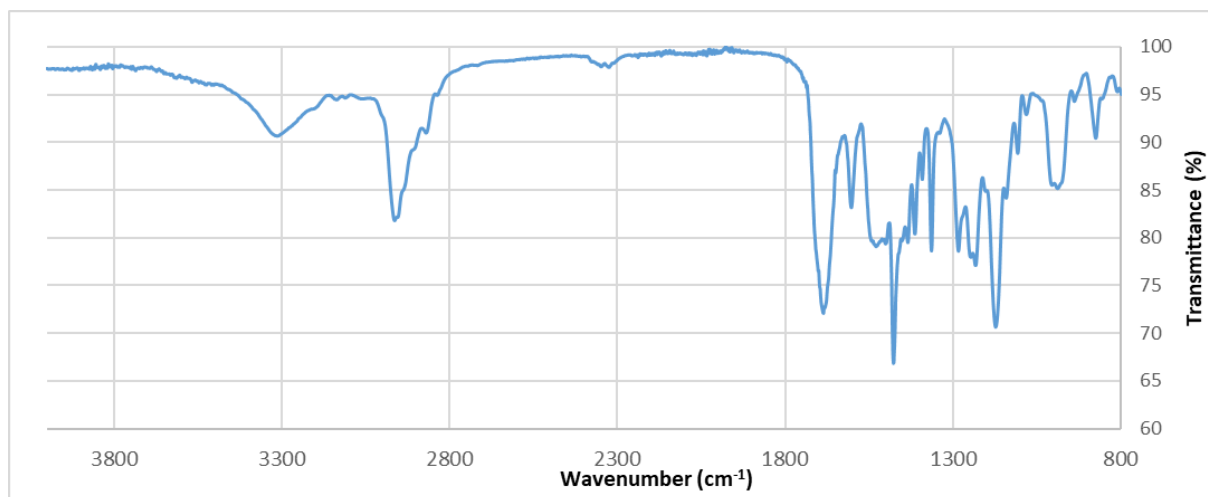

**Figure S5.** ATR-FTIR spectrum of **2**.

## Characterization of 3

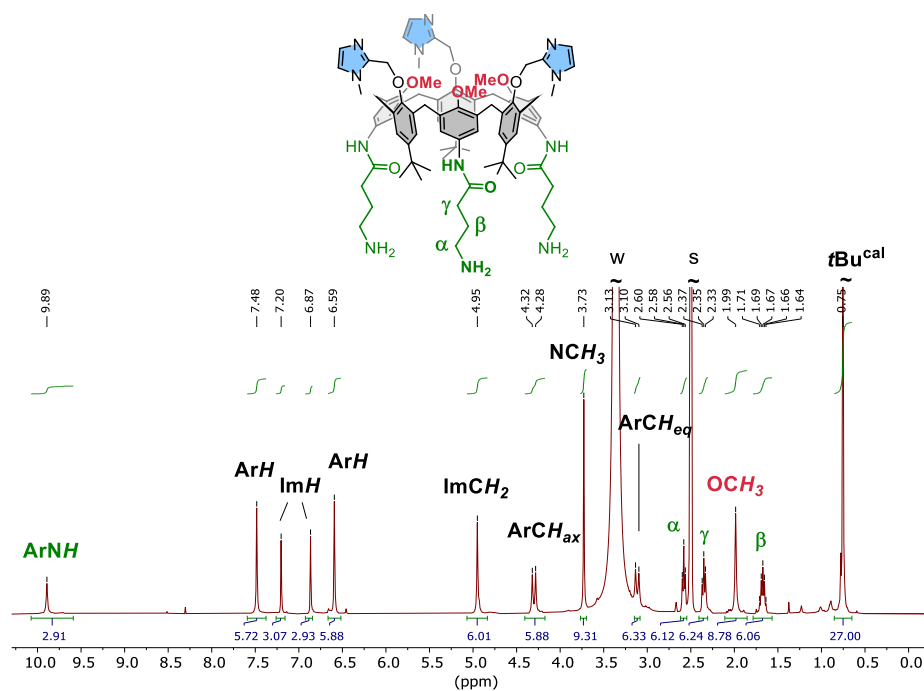

Figure S6.  $^1\text{H}$  NMR spectrum (298K, 400 MHz,  $\text{DMSO}-d_6$ ) of **3**. s: residual solvent, w: water.

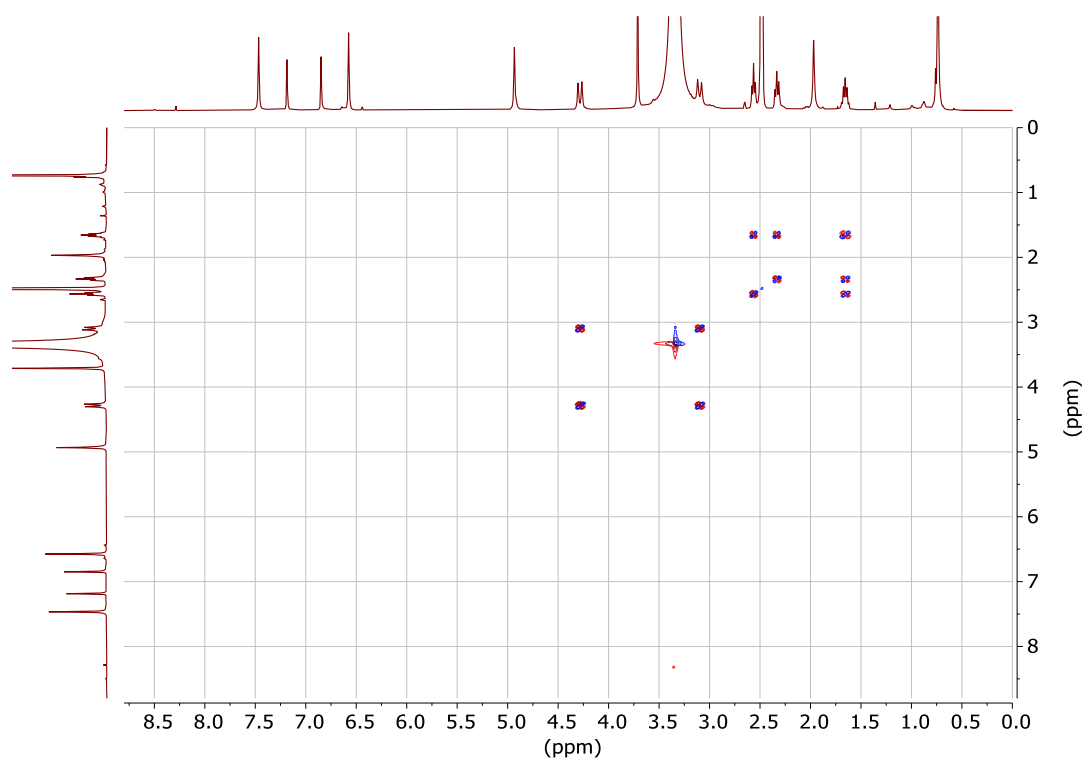

Figure S7. COSY NMR spectrum (298K, 400 MHz,  $\text{DMSO}-d_6$ ) of **3**.

$^{13}\text{C}$  NMR characterization was attempted but only small signals could be detected after a prolonged analysis time and over 5000 scans (Figure S8). However, a HSQC spectrum allowed the assignment of some of the  $^{13}\text{C}$  signals (Figure S9).

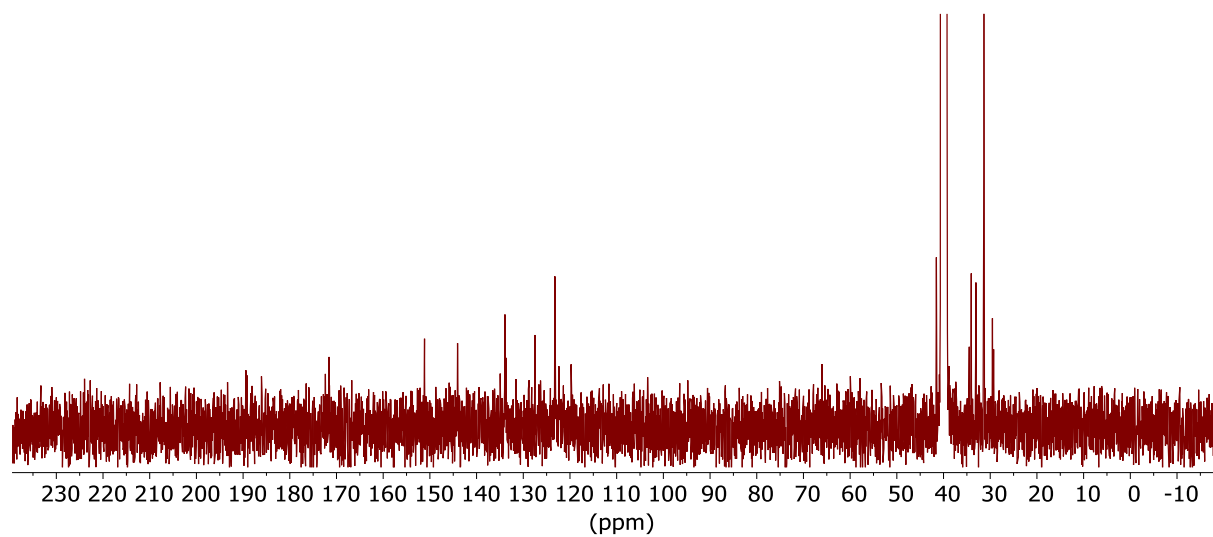

**Figure S8.**  $^{13}\text{C}$  NMR spectrum (298K, 400 MHz,  $\text{DMSO-}d_6$ ) of **3**.

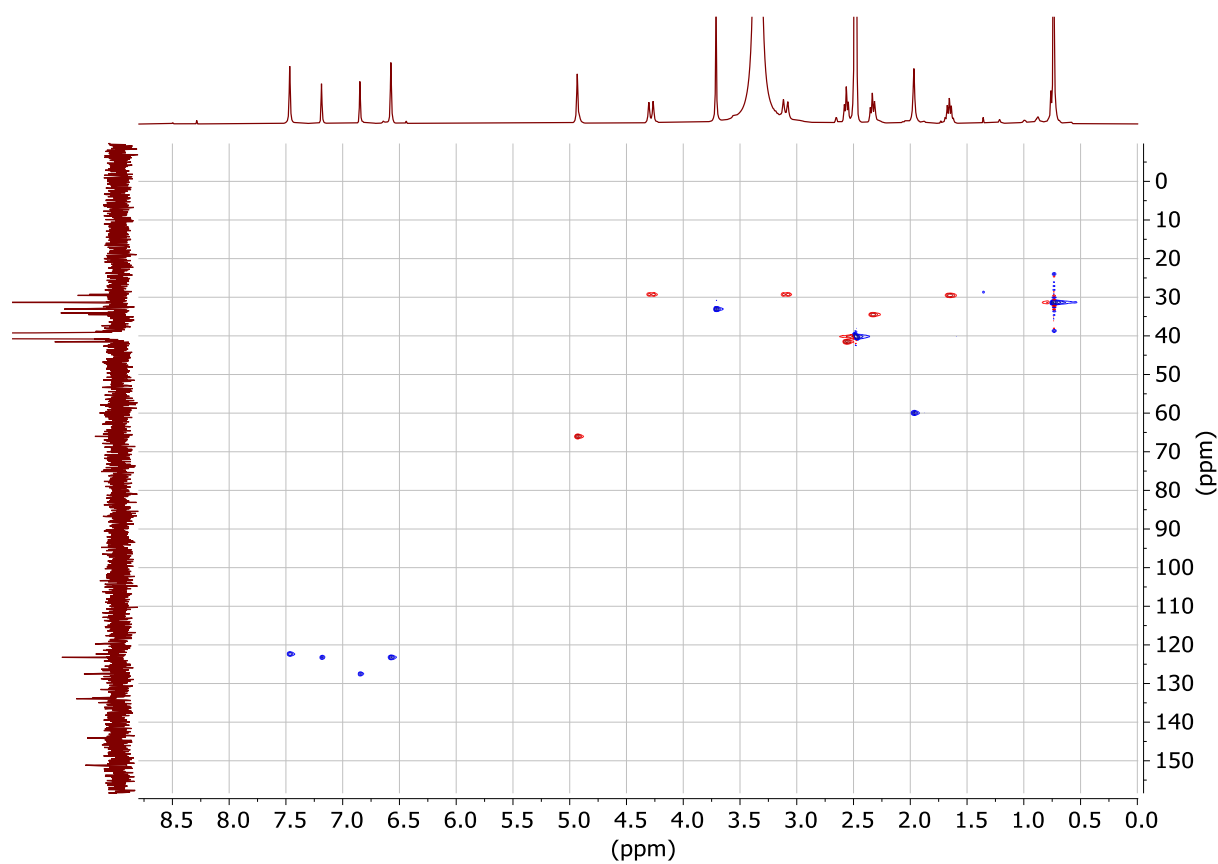

**Figure S9.** Edited HSQC NMR spectrum (298K, 400 MHz,  $\text{DMSO-}d_6$ ) of **3**.

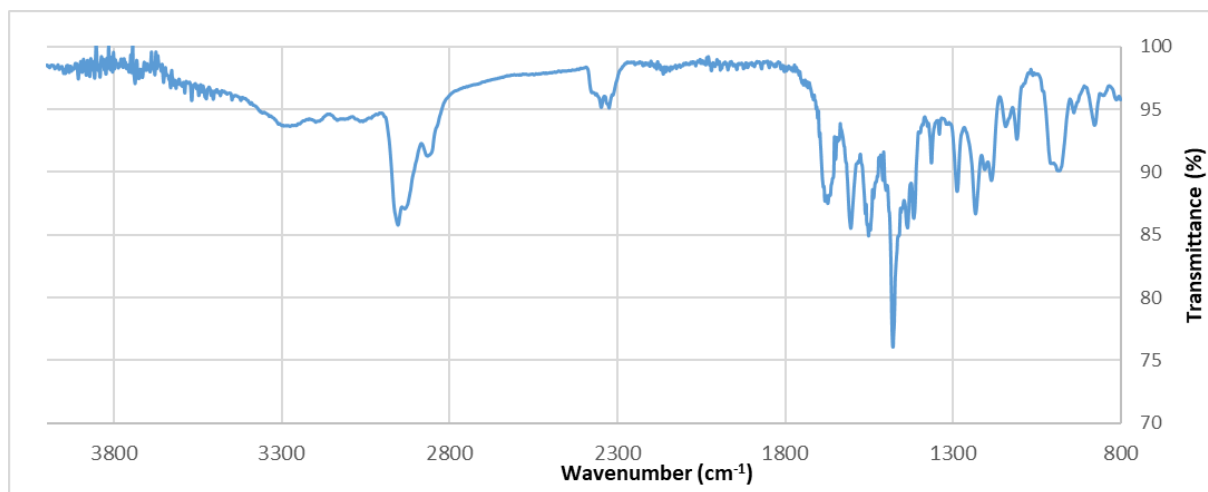

**Figure S10.** ATR-FTIR spectrum of **3**.



### Titration for the formation of the complexes in CDCl<sub>3</sub>/CD<sub>3</sub>CN 1:1

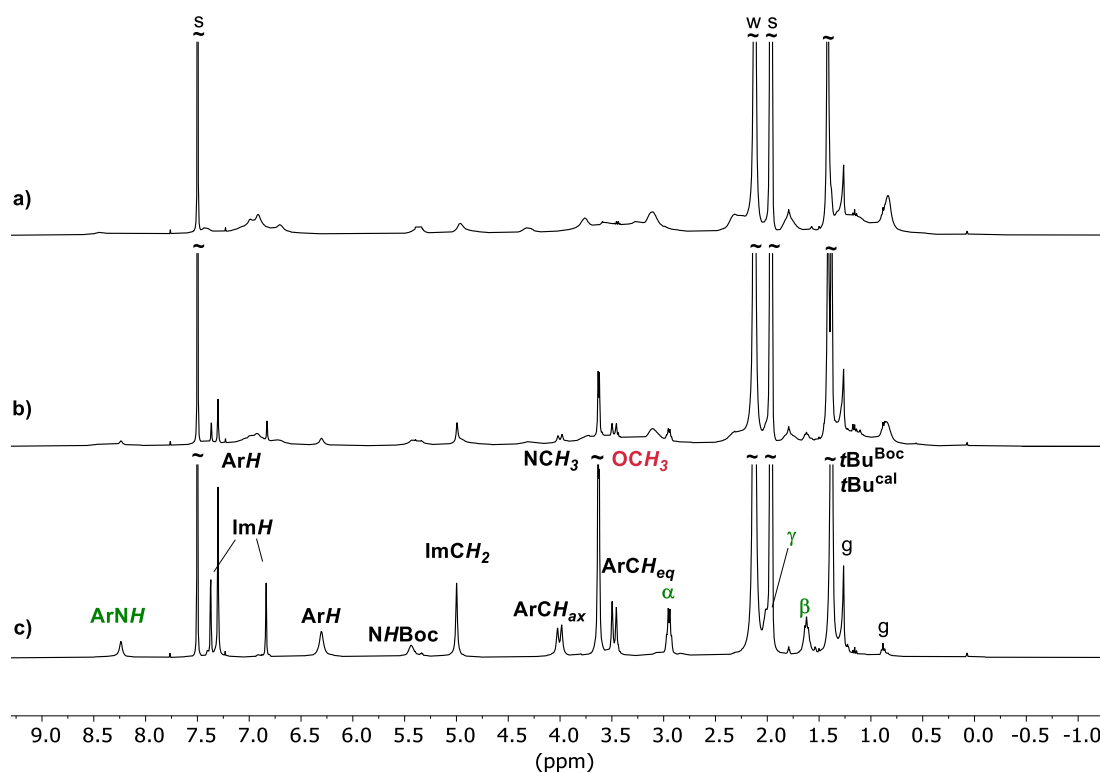

**Figure S11.** <sup>1</sup>H NMR spectra (298 K, 400 MHz, CDCl<sub>3</sub>/CD<sub>3</sub>CN 1:1) of a) **2** (1 mM), b) **2** (1 mM) + ~0.4 equiv. of Zn(OTf)<sub>2</sub>, c) **2** (1 mM) + ~1.0 equiv. of Zn(OTf)<sub>2</sub>. s = residual solvents, w = water, g = grease.

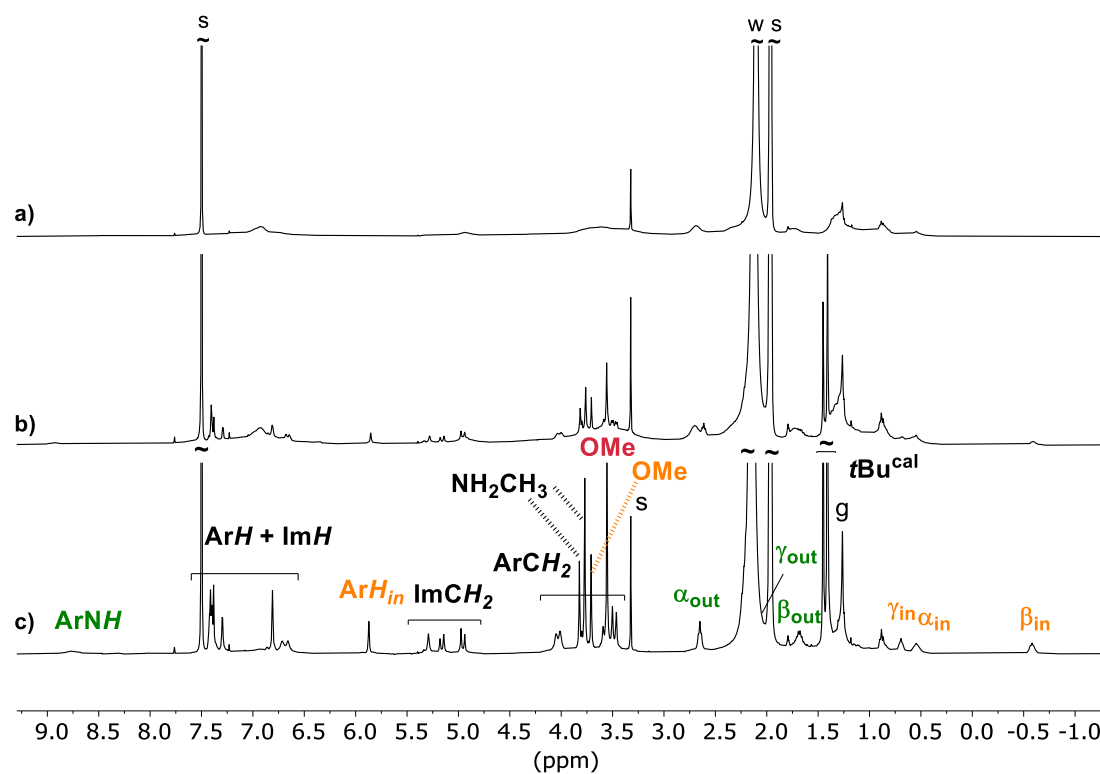

**Figure S12.** <sup>1</sup>H NMR spectra (298 K, 400 MHz, CDCl<sub>3</sub>/CD<sub>3</sub>CN 1:1) of a) **3** (1 mM), b) **3** (1 mM) + ~0.4 equiv. of Zn(OTf)<sub>2</sub>, c) **3** (1 mM) + ~1.0 equiv. of Zn(OTf)<sub>2</sub>. s = residual solvents, w = water, g = grease.

## Characterization of complex $2\text{-Zn}^{2+}$ in $\text{CDCl}_3/\text{CD}_3\text{CN}$ 1:1

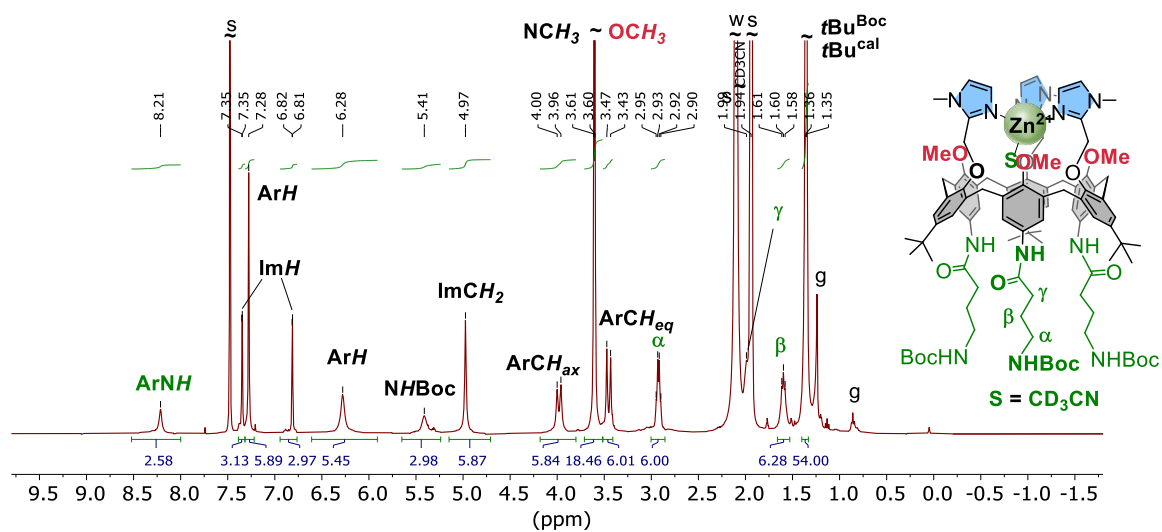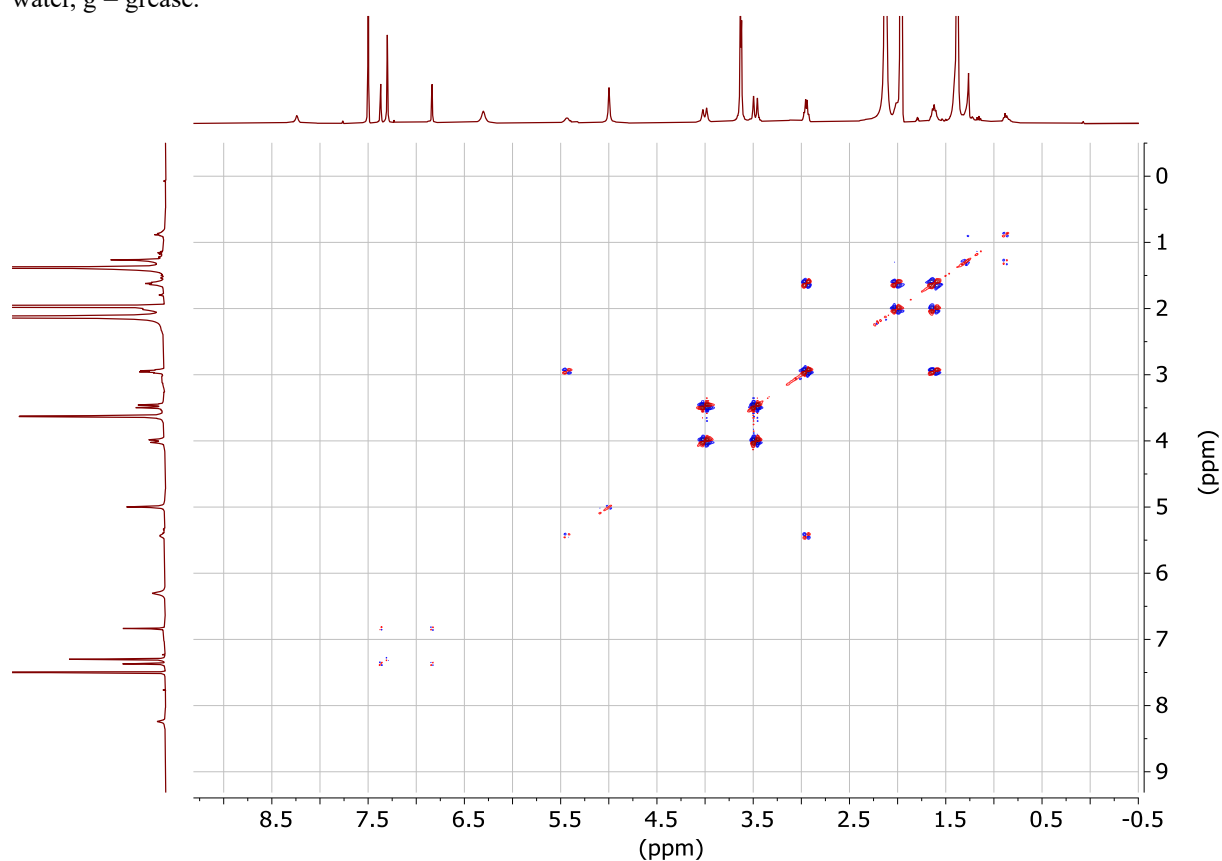

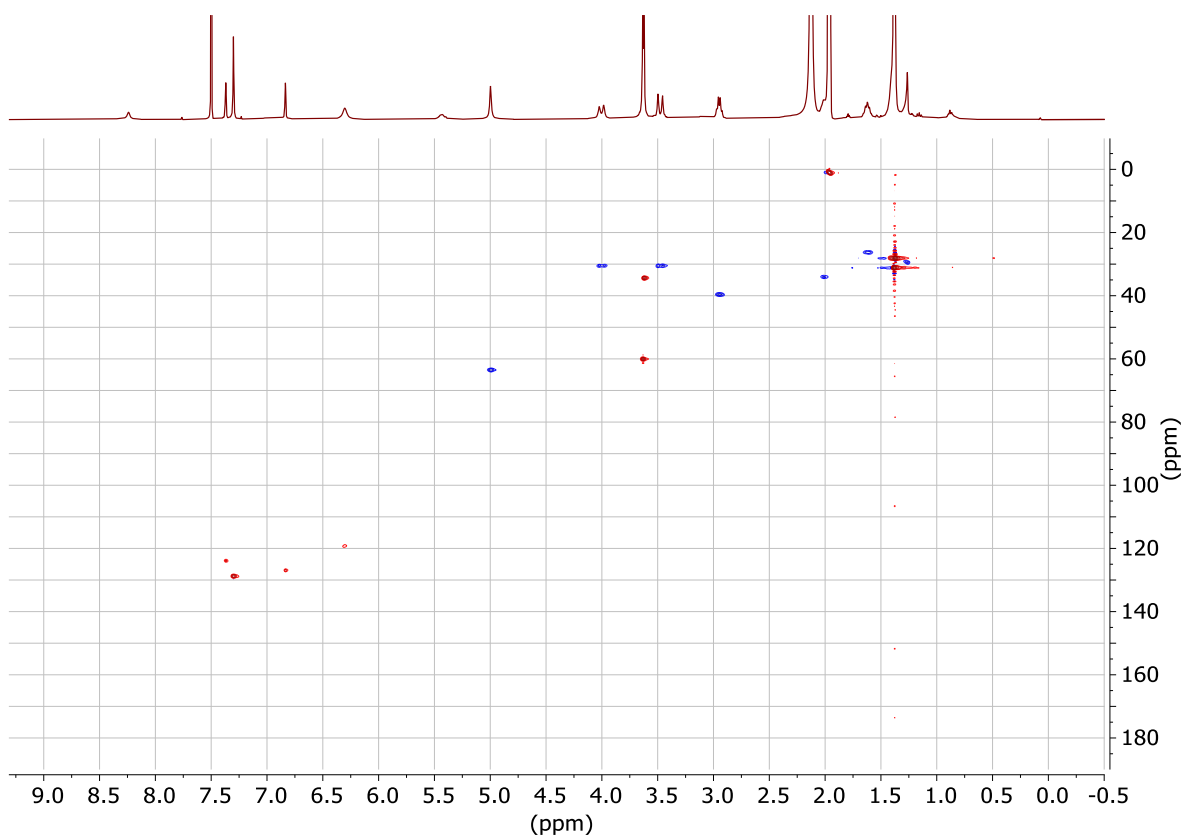

**Figure S15.** Edited HSQC NMR spectrum (298K, 400 MHz,  $\text{CDCl}_3/\text{CD}_3\text{CN}$  1:1) of  $2\text{-Zn}^{2+}$  (1 mM). The  $^{13}\text{C}$  NMR spectrum has not been recorded for  $2\text{-Zn}^{2+}$ .

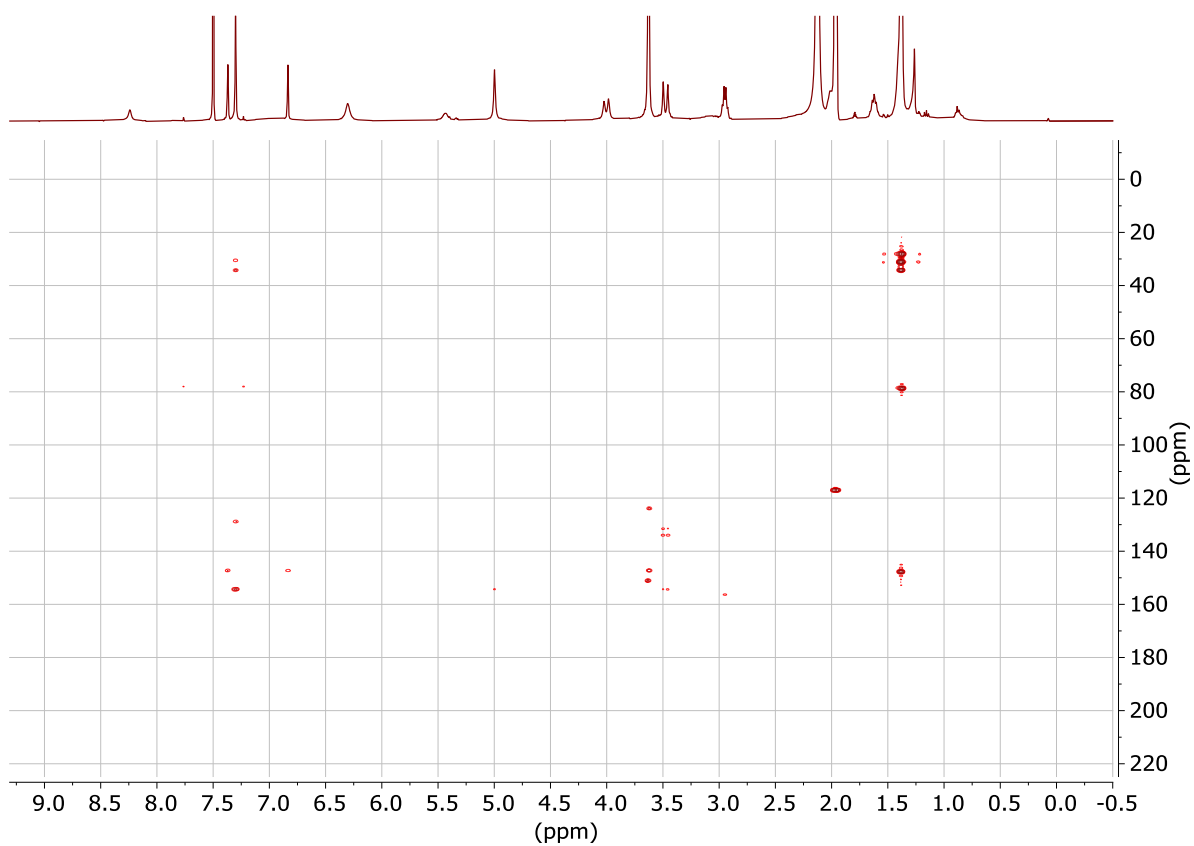

**Figure S16.** HMBC NMR spectrum (298K, 400 MHz,  $\text{CDCl}_3/\text{CD}_3\text{CN}$  1:1) of  $2\text{-Zn}^{2+}$  (1 mM). The  $^{13}\text{C}$  NMR spectrum has not been recorded for  $2\text{-Zn}^{2+}$ .

### Characterization of complex $3\text{-Zn}^{2+}$ in $\text{CDCl}_3/\text{CD}_3\text{CN}$ 1:1

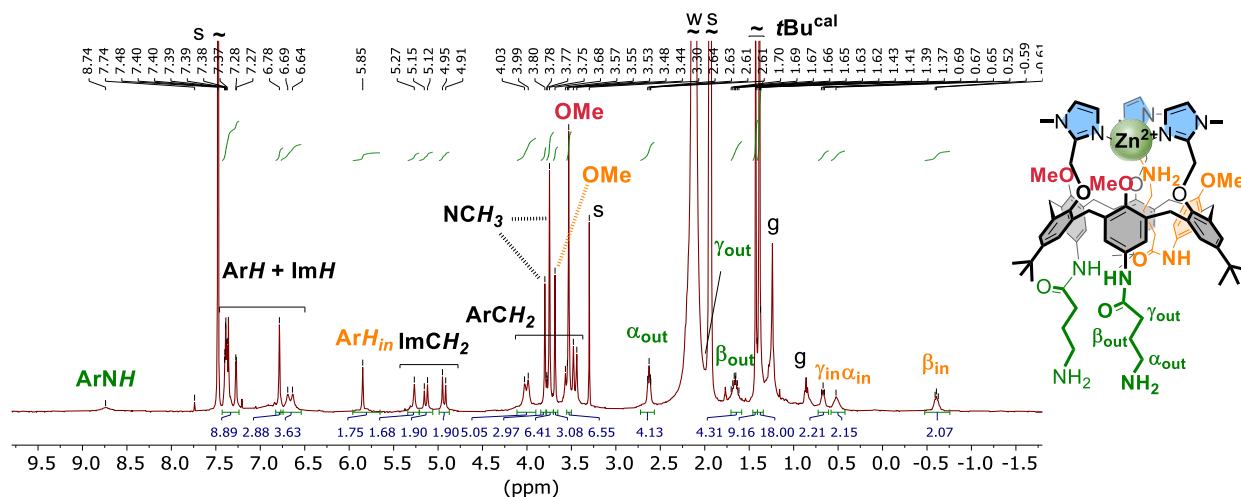

**Figure S17.**  $^1\text{H}$  NMR spectrum (298K, 400 MHz,  $\text{CDCl}_3/\text{CD}_3\text{CN}$  1:1) of  $3\text{-Zn}^{2+}$  (1 mM). s: residual solvent, w: water, g = grease.

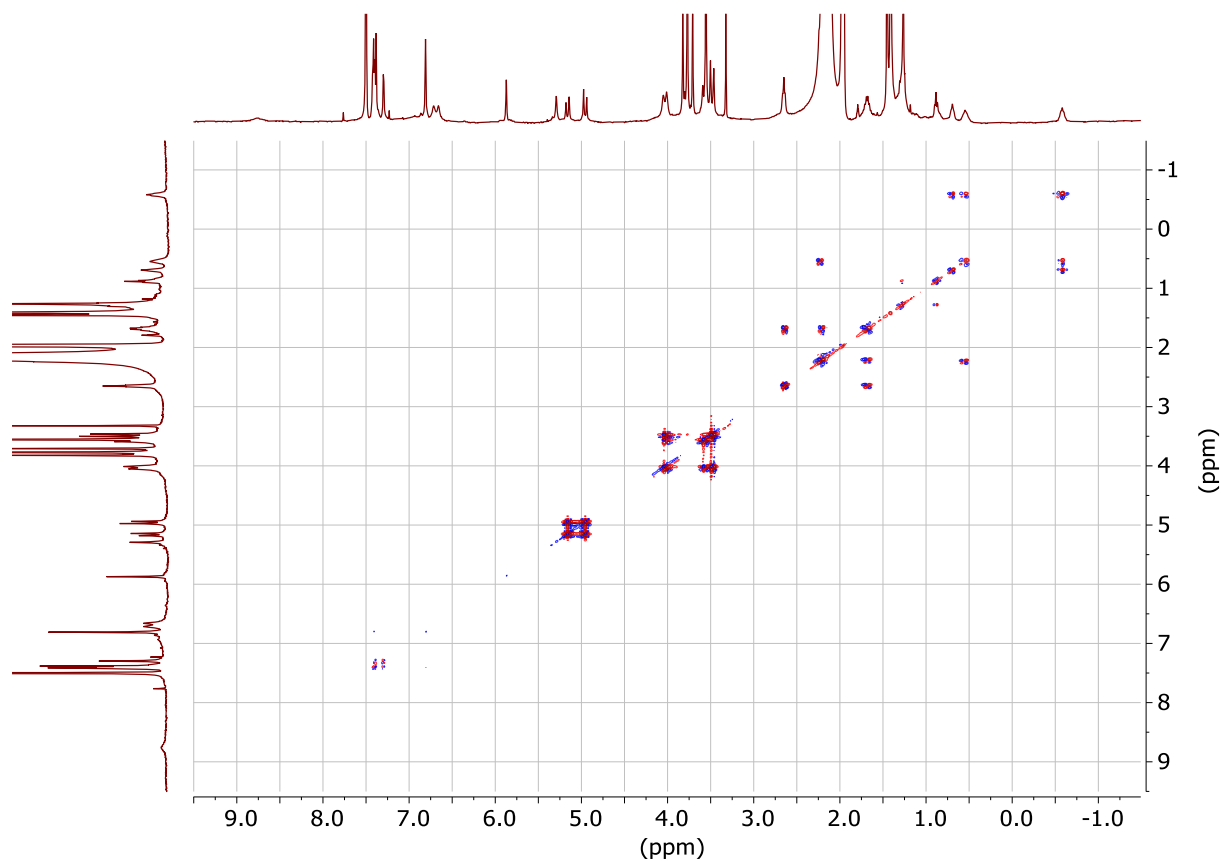

**Figure S18.** COSY NMR spectrum (298K, 400 MHz,  $\text{CDCl}_3/\text{CD}_3\text{CN}$  1:1) of  $3\text{-Zn}^{2+}$  (1 mM).

$^{13}\text{C}$  NMR characterization was attempted but only small signals could be detected after a prolonged analysis time and over 5000 scans (Figure S19). However, a HSQC spectrum allowed the assignment of some of the  $^{13}\text{C}$  signals (Figure S20).

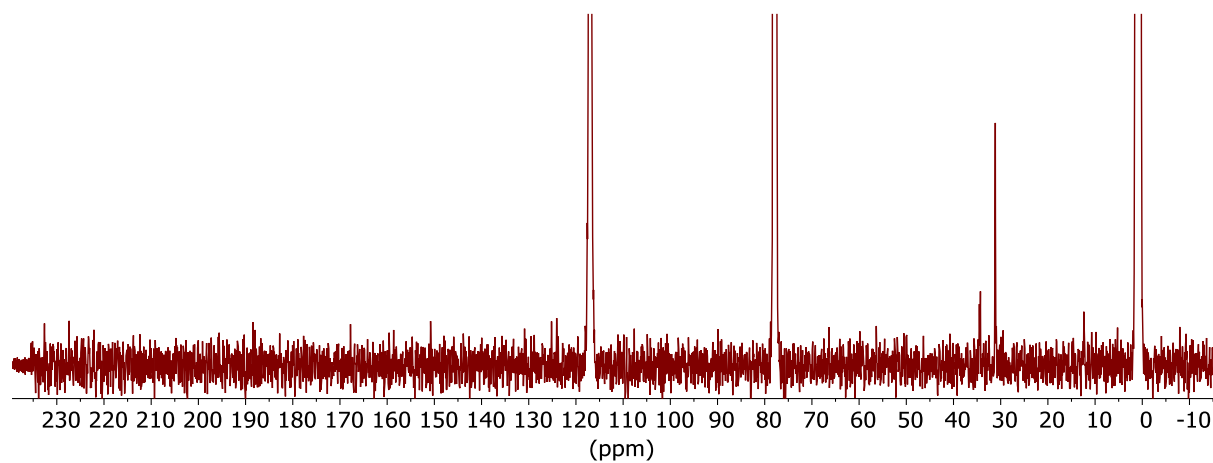

**Figure S19.**  $^{13}\text{C}$  NMR spectrum (298K, 400 MHz,  $\text{CDCl}_3/\text{CD}_3\text{CN}$  1:1) of  $3\text{-Zn}^{2+}$ .

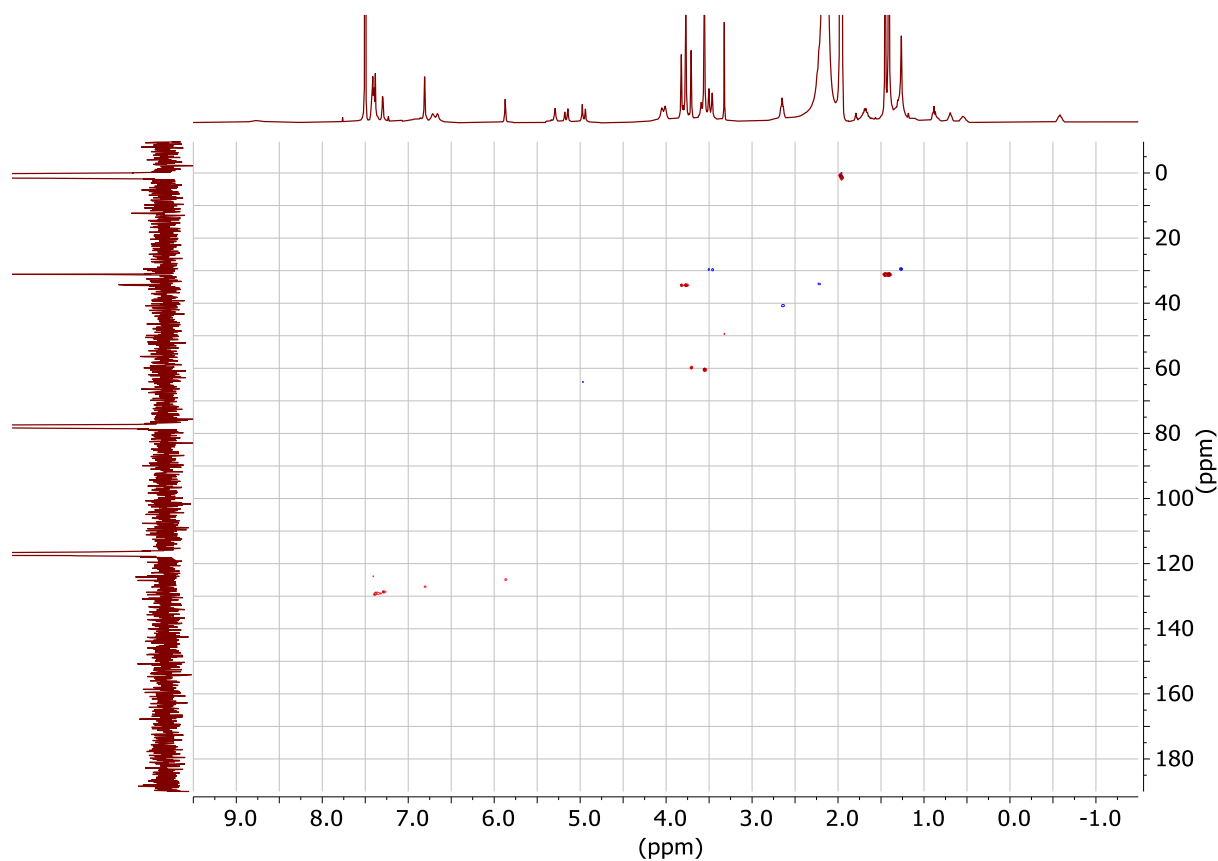

**Figure S20.** Edited HSQC NMR spectrum (298K, 400 MHz,  $\text{CDCl}_3/\text{CD}_3\text{CN}$  1:1) of  $3\text{-Zn}^{2+}$  (1 mM).

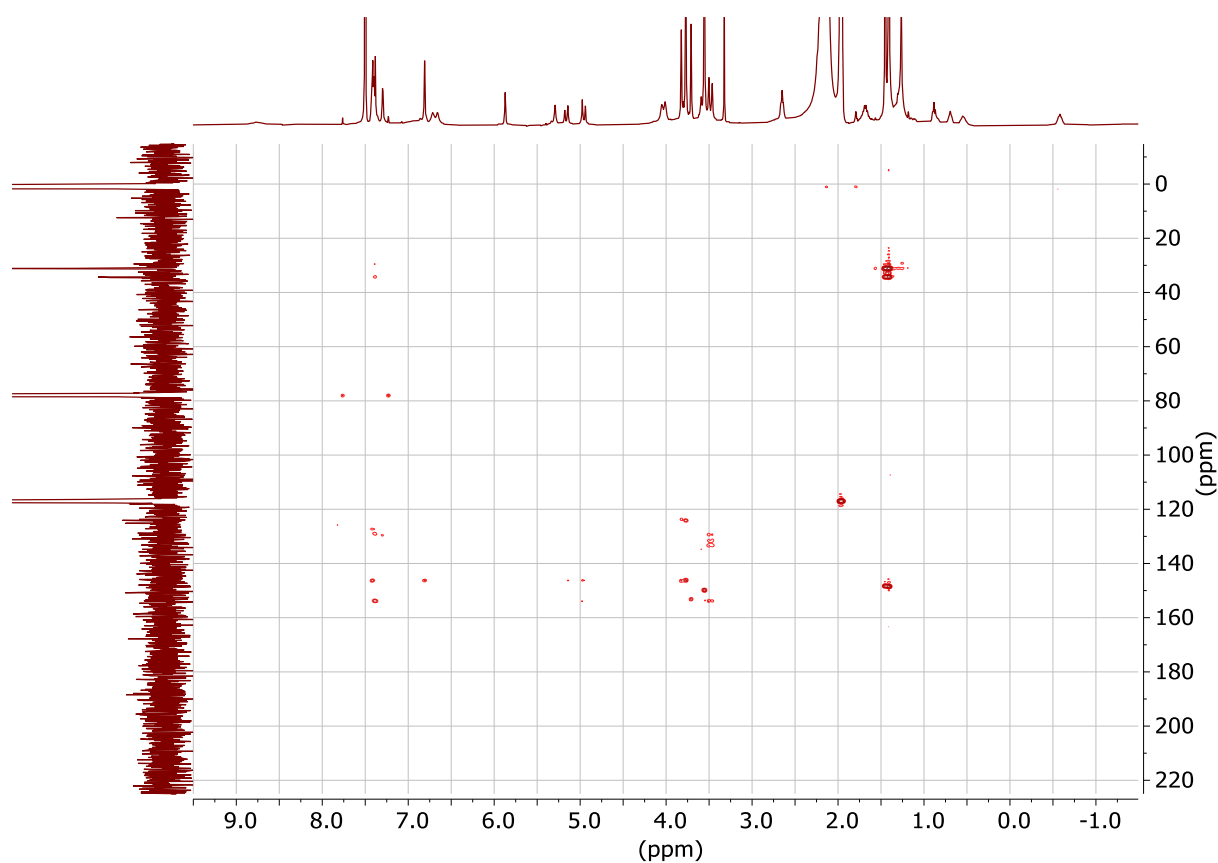

Figure S21. HMBC NMR spectrum (298K, 400 MHz, CDCl<sub>3</sub>/CD<sub>3</sub>CN 1:1) of **3-Zn<sup>2+</sup>** (1 mM).

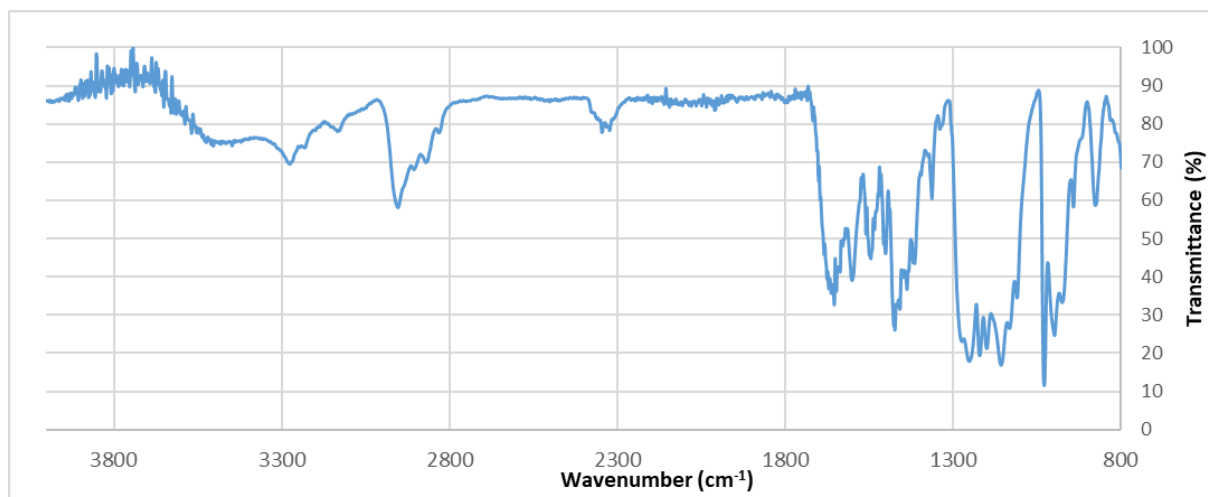

Figure S22. ATR-FTIR spectrum of **3-Zn<sup>2+</sup>**.

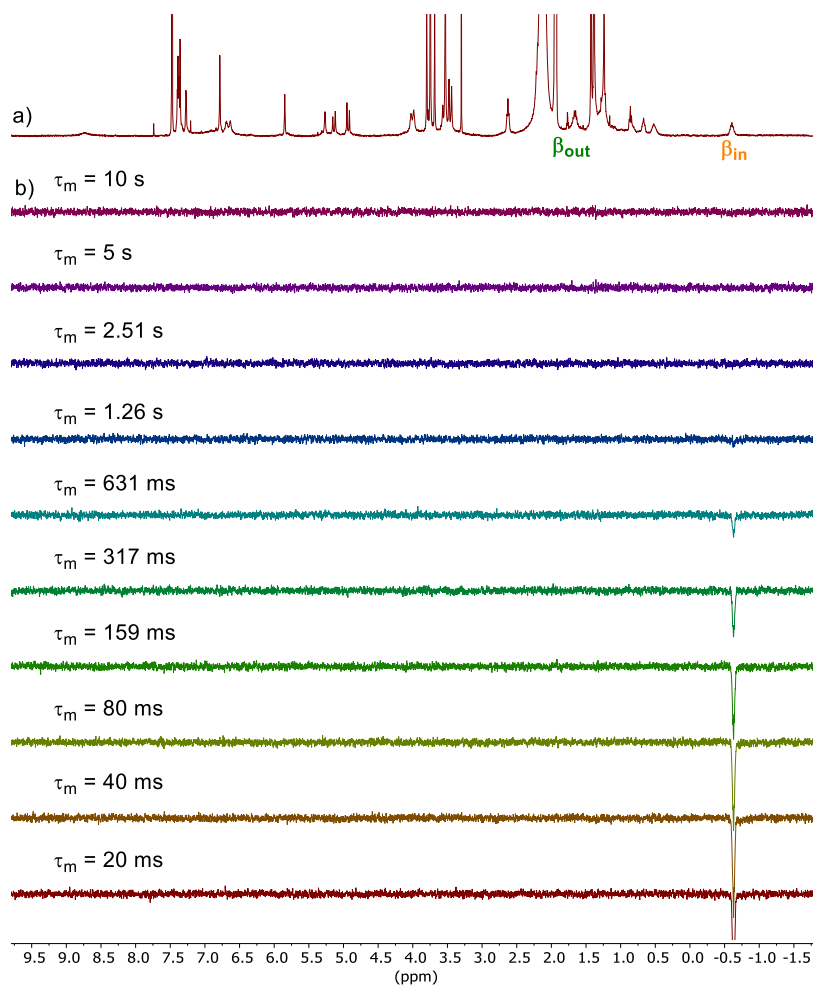

**Figure S23.**  $^1\text{H}$  NMR spectra (298 K, 600 MHz,  $\text{CDCl}_3/\text{CD}_3\text{CN}$  1:1) of a)  $3\text{-Zn}^{2+}$ , b) 1D EXSY spectra (at various mixing times) after selective excitation of the  $\beta_{\text{in}}$  signal at  $-0.61$  ppm.

## Titration for the formation of the complexes in DMSO

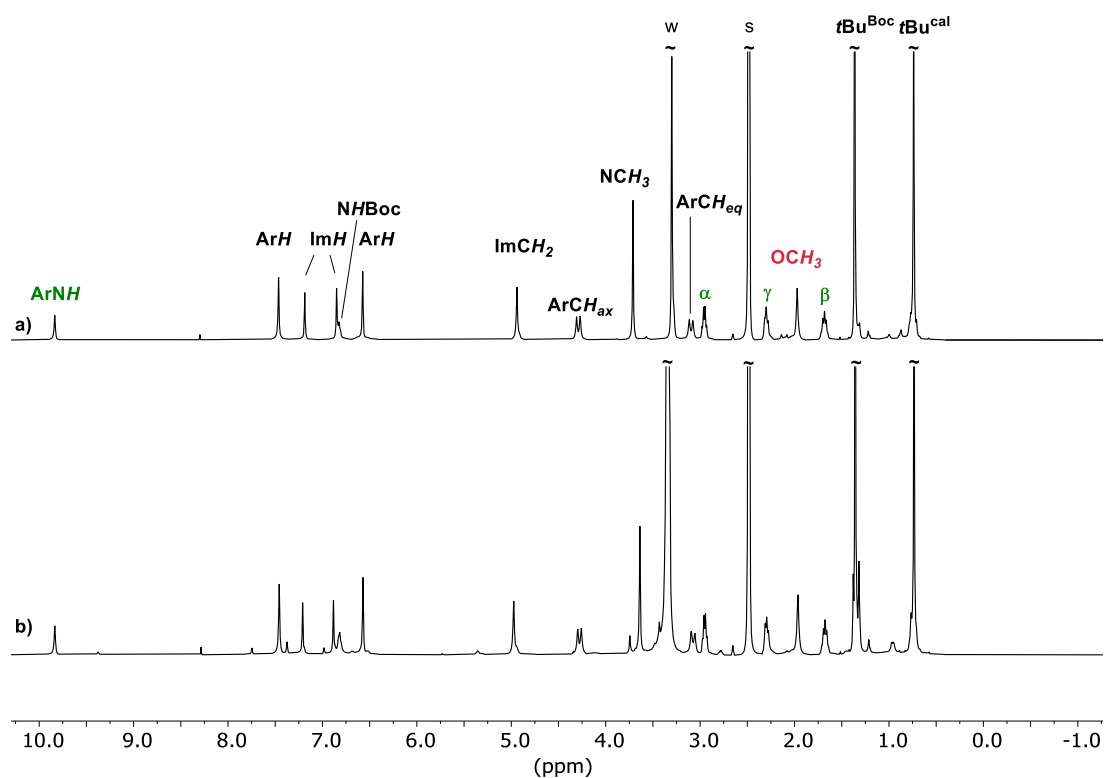

**Figure S24.**  $^1\text{H}$  NMR spectra (298 K, 400 MHz,  $\text{DMSO-}d_6$ ) of a) **2** (2 mM), b) **2** (2 mM) +  $\sim 27$  equiv. of  $\text{Zn}(\text{OTf})_2$ . s = residual solvents, w = water.

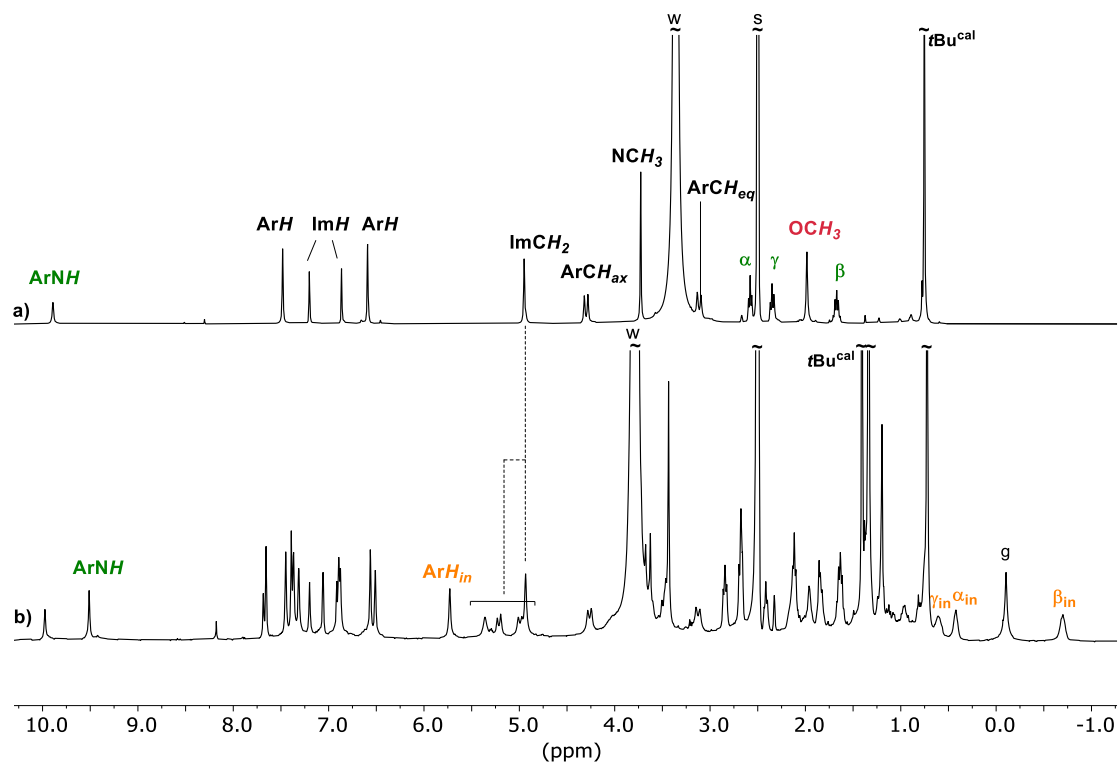

**Figure S25.**  $^1\text{H}$  NMR spectra (298 K, 400 MHz,  $\text{DMSO-}d_6$ ) of a) **3** (2 mM), b) **3** (2 mM) +  $\sim 27$  equiv. of  $\text{Zn}(\text{OTf})_2$ . s = residual solvents, w = water.



## Formation and characterization of complex $4\text{-Zn}^{2+}$ in $\text{CDCl}_3/\text{CD}_3\text{CN}$ 1:1

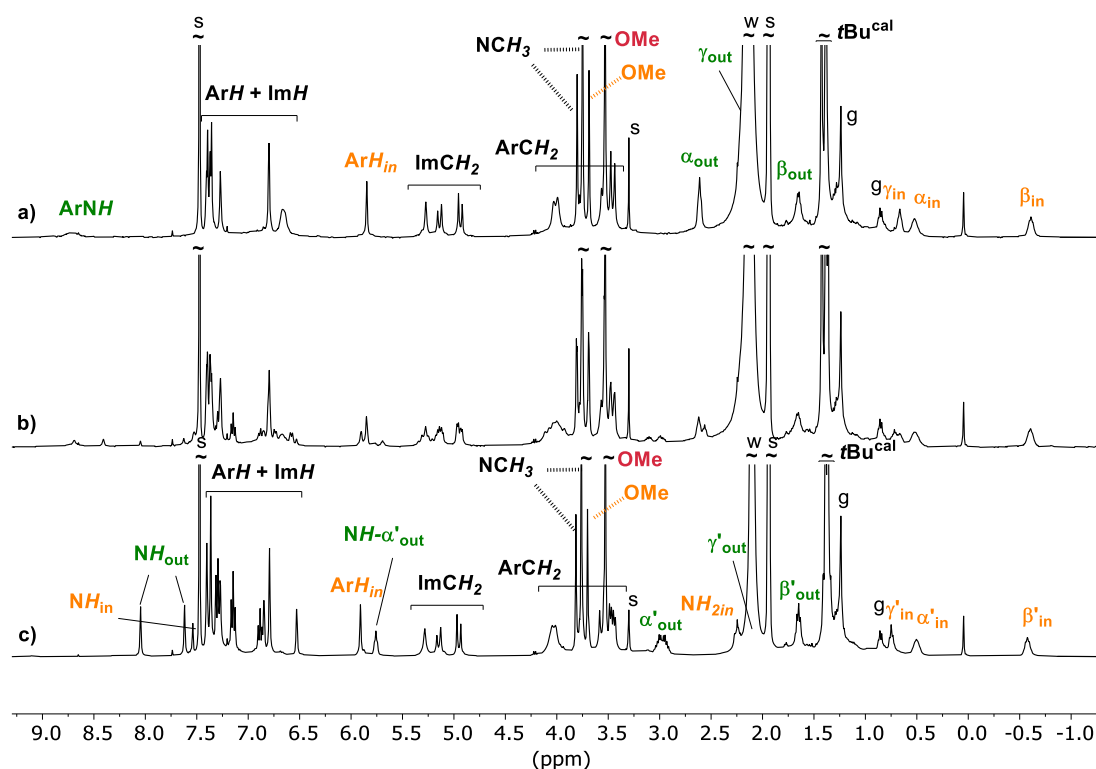

**Figure S26.**  $^1\text{H}$  NMR spectra (298 K, 400 MHz,  $\text{CDCl}_3/\text{CD}_3\text{CN}$  1:1) of a) **3** (2 mM) +  $\sim 1.0$  equiv. of  $\text{Zn}(\text{OTf})_2$ , b) **3** (2 mM) +  $\sim 1.0$  equiv. of  $\text{Zn}(\text{OTf})_2$  +  $\sim 0.6$  equiv. phenylisocyanate, c) **3** (2 mM) +  $\sim 1.0$  equiv. of  $\text{Zn}(\text{OTf})_2$  +  $\sim 2$  equiv. phenylisocyanate  $\rightarrow 4\text{-Zn}^{2+}$ . s = residual solvents, w = water, g = grease.

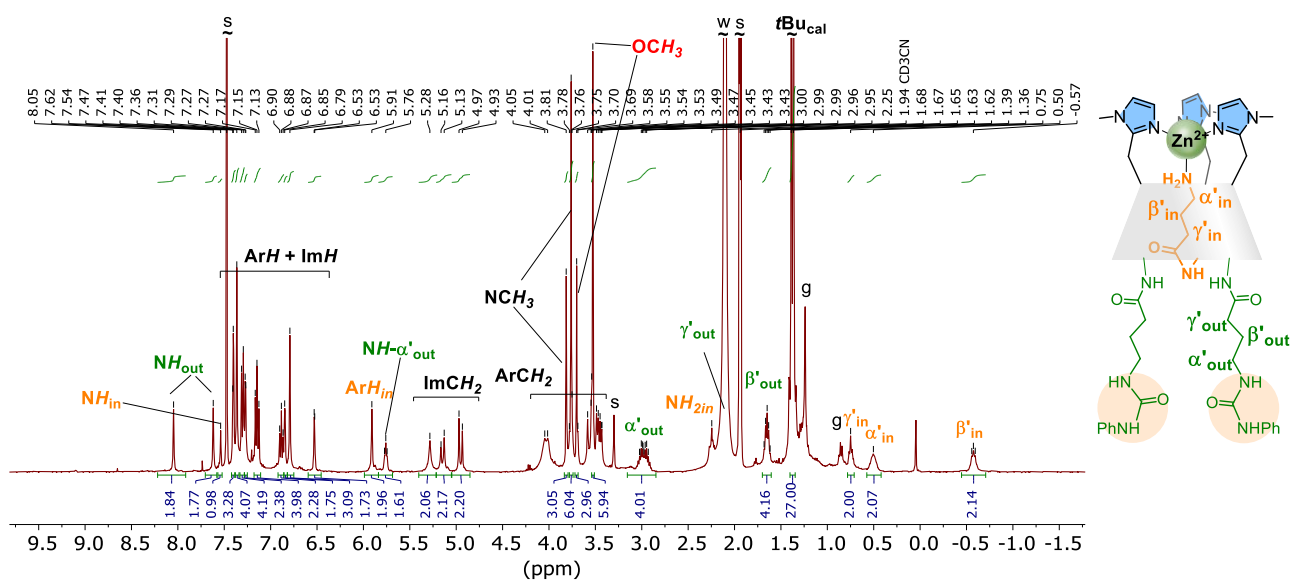

**Figure S27.**  $^1\text{H}$  NMR spectrum (298K, 400 MHz,  $\text{CDCl}_3/\text{CD}_3\text{CN}$  1:1) of  $4\text{-Zn}^{2+}$  (2 mM). s: residual solvent, w: water, g = grease.

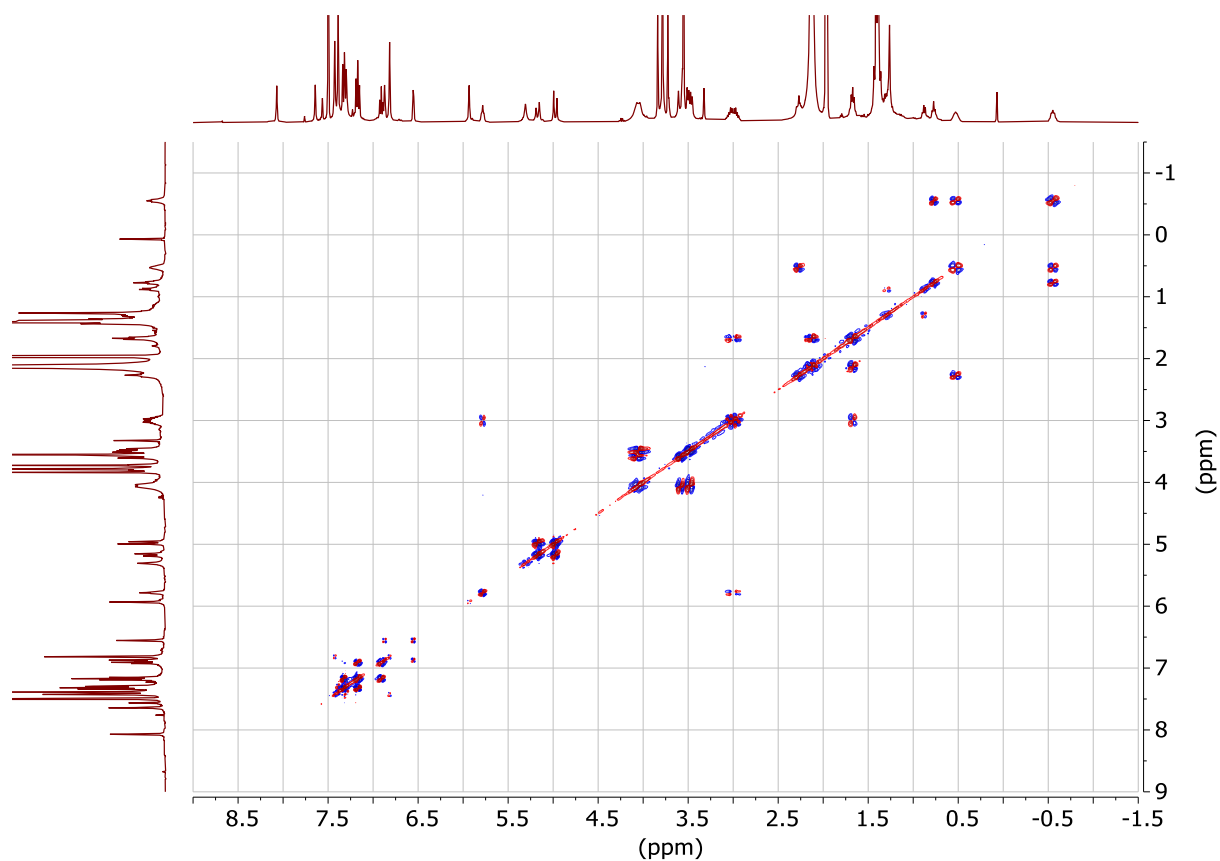

**Figure S28.** COSY NMR spectrum (298K, 400 MHz,  $\text{CDCl}_3/\text{CD}_3\text{CN}$  1:1) of  $4\text{-Zn}^{2+}$  (2 mM).

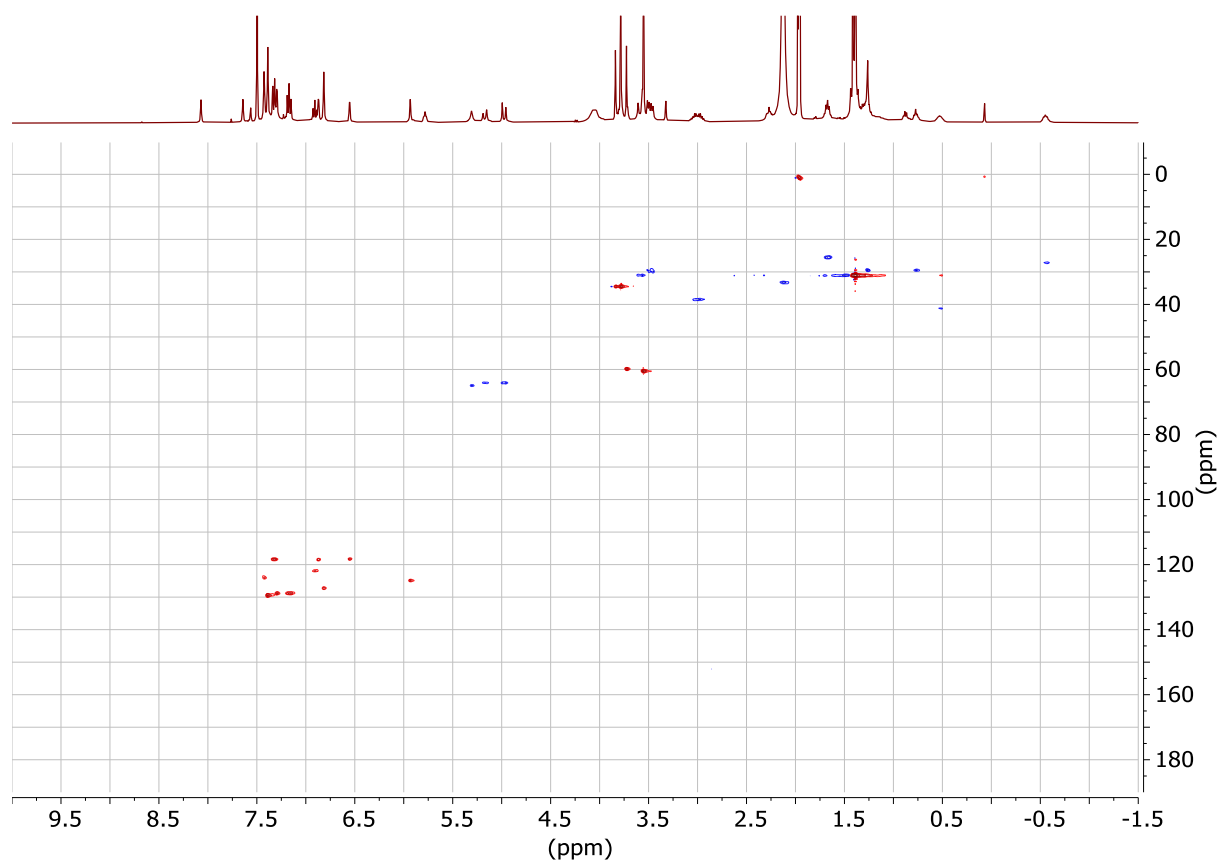

**Figure S29.** Edited HSQC NMR spectrum (298K, 400 MHz,  $\text{CDCl}_3/\text{CD}_3\text{CN}$  1:1) of  $4\text{-Zn}^{2+}$  (2 mM). The  $^{13}\text{C}$  NMR spectrum has not been recorded for  $4\text{-Zn}^{2+}$ .

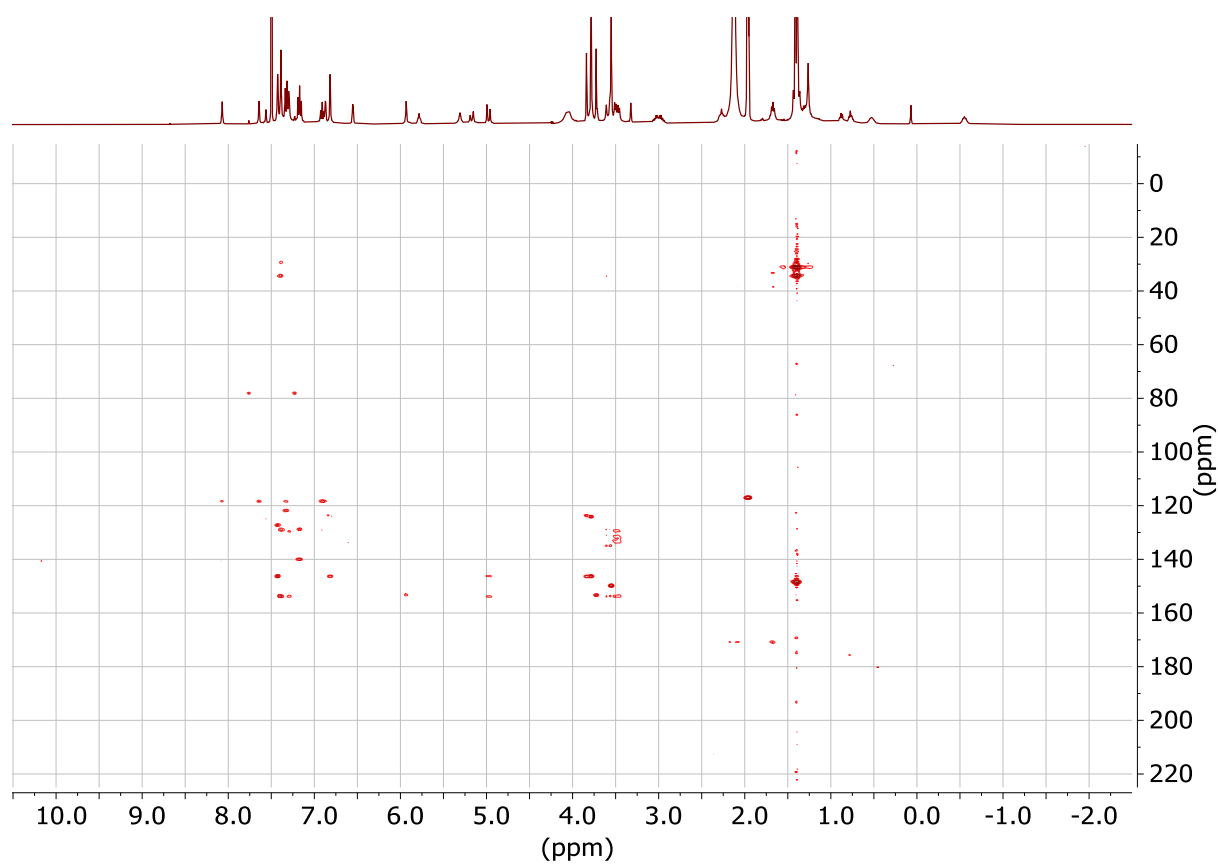

**Figure S30.** HMBC NMR spectrum (298K, 400 MHz, CDCl<sub>3</sub>/CD<sub>3</sub>CN 1:1) of **4-Zn<sup>2+</sup>** (2 mM). The <sup>13</sup>C NMR spectrum has not been recorded for **4-Zn<sup>2+</sup>**.

## Competition experiments in CDCl<sub>3</sub>/CD<sub>3</sub>CN 1:1

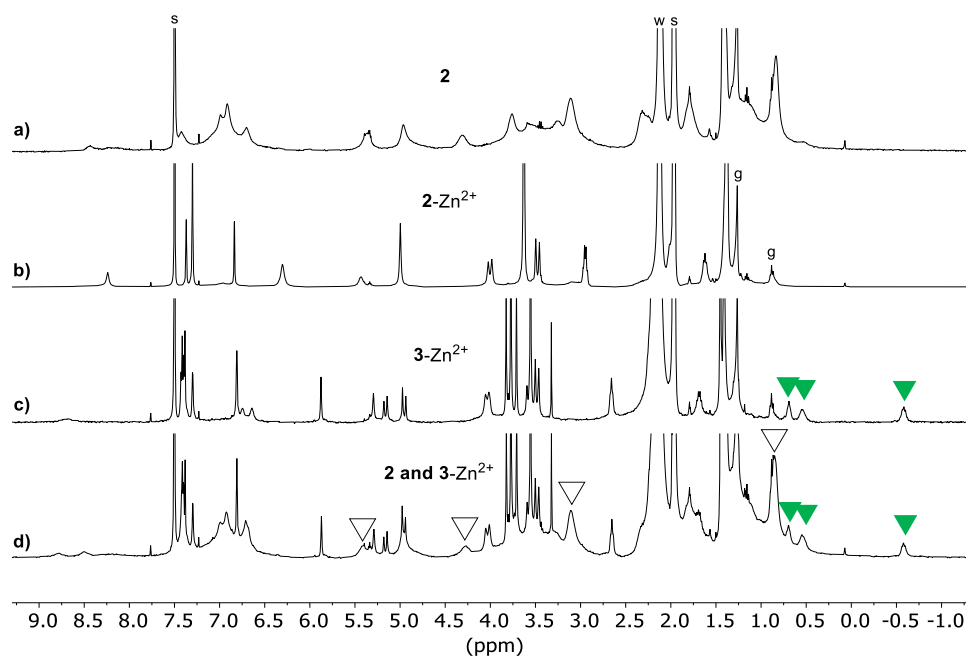

**Figure S31.** <sup>1</sup>H NMR spectra (298 K, 400 MHz, CDCl<sub>3</sub>/CD<sub>3</sub>CN 1:1) of a) **2** (1 mM), b) **2** (1 mM) + 1 equiv. Zn(OTf)<sub>2</sub> → **2**-Zn<sup>2+</sup>, c) **3** (1 mM) + 1 equiv. Zn(OTf)<sub>2</sub> → **3**-Zn<sup>2+</sup>, d) **2** (1 mM) + **3** (1 mM) + 1 equiv. Zn(OTf)<sub>2</sub> (1 mM) → only **3**-Zn<sup>2+</sup>. s = residual solvents, w = water, g = grease. ▼ = **3**-Zn<sup>2+</sup> signals (some of them, of interest) and ▽ = free **2**.

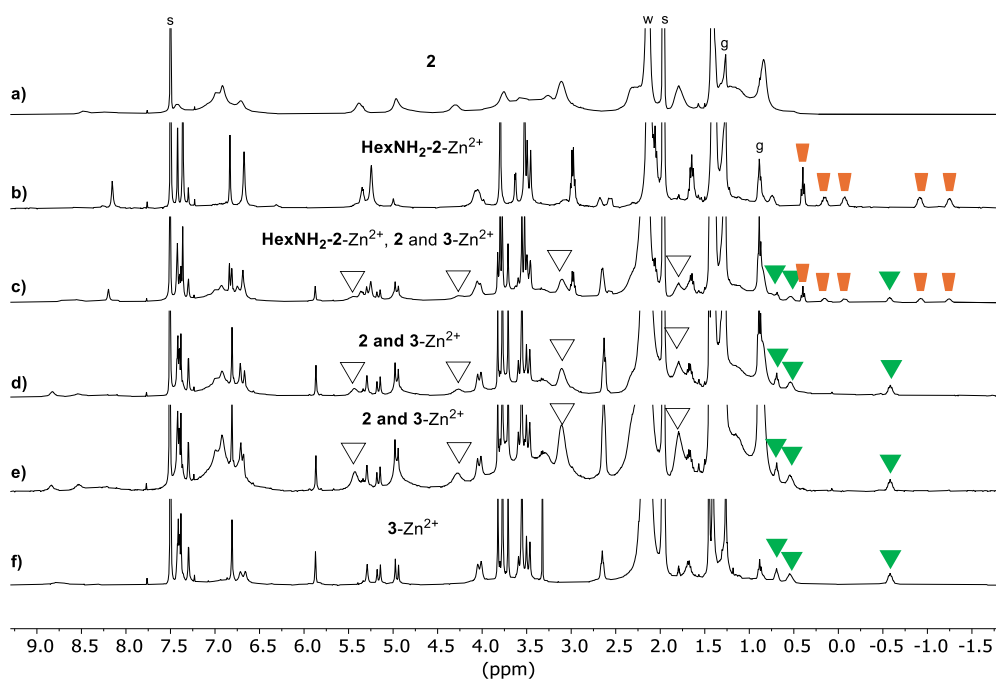

**Figure S32.** <sup>1</sup>H NMR spectra (298 K, 400 MHz, CDCl<sub>3</sub>/CD<sub>3</sub>CN 1:1) of a) **2** (1 mM), b) **2** (1 mM) + 1.6 equiv. HexNH<sub>2</sub> + 1 equiv. Zn(OTf)<sub>2</sub> → HexNH<sub>2</sub>-**2**-Zn<sup>2+</sup>, c) **2** (1 mM) + 1 equiv. HexNH<sub>2</sub> + 1 equiv. Zn(OTf)<sub>2</sub> + 0.5 equiv. **3** (0.5 mM) → HexNH<sub>2</sub>-**2**-Zn<sup>2+</sup> (50%) and **3**-Zn<sup>2+</sup> (50%), d) **2** (1 mM) + 1 equiv. HexNH<sub>2</sub> + 1 equiv. Zn(OTf)<sub>2</sub> + 1 equiv. **3** (1 mM) → only **3**-Zn<sup>2+</sup>, e) **2** (2 mM) + 1 equiv. HexNH<sub>2</sub> (2 mM) + 0.5 equiv. Zn(OTf)<sub>2</sub> + 0.5 equiv. **3** (1 mM) → only **3**-Zn<sup>2+</sup>, f) **3** (1 mM) + 1 equiv. Zn(OTf)<sub>2</sub> → **3**-Zn<sup>2+</sup> (spectrum for comparison). s = residual solvents, w = water, g = grease. ▼ = HexNH<sub>2</sub>-**2**-Zn<sup>2+</sup>, ▼ = **3**-Zn<sup>2+</sup> signals (some of them, of interest) and ▽ = free **2**.

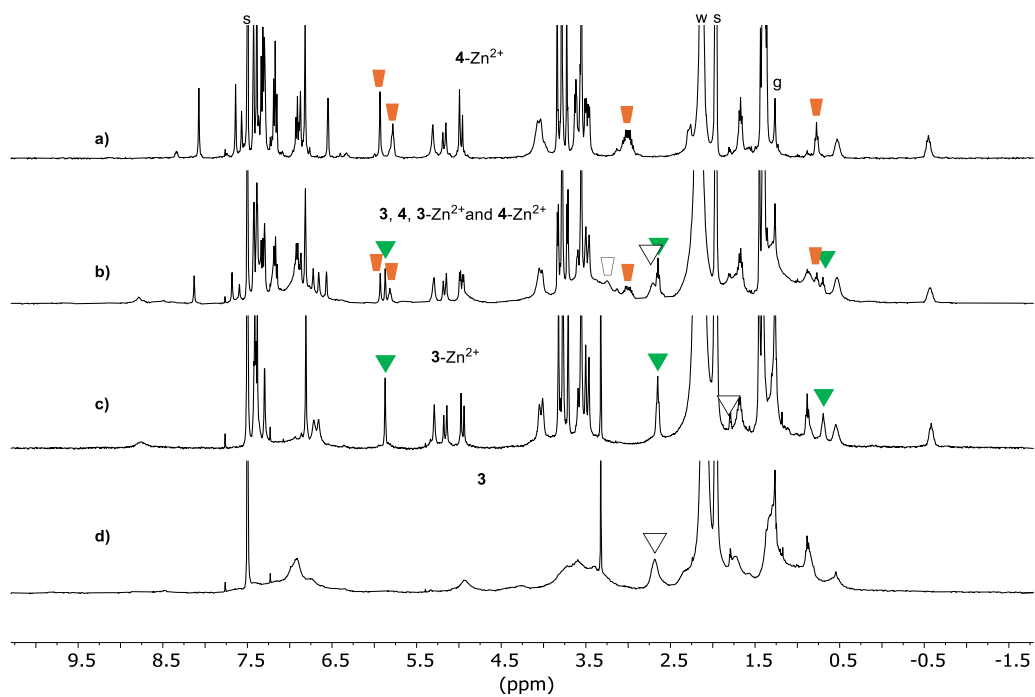

**Figure S33.**  $^1\text{H}$  NMR spectra (298 K, 400 MHz,  $\text{CDCl}_3/\text{CD}_3\text{CN}$  1:1) of a) **4** (2 mM) + 1 equiv.  $\text{Zn}(\text{OTf})_2 \rightarrow 4\text{-Zn}^{2+}$ , b) **4** (2 mM) + 1 equiv.  $\text{Zn}(\text{OTf})_2$  + 1 equiv. **3**  $\rightarrow 4\text{-Zn}^{2+}$  (50%) and  $3\text{-Zn}^{2+}$  (50%), c) **3** (1 mM) + 1 equiv.  $\text{Zn}(\text{OTf})_2 \rightarrow 3\text{-Zn}^{2+}$ , d) **3** (1 mM). s = residual solvents, w = water, g = grease.  $\blacktriangle$  =  $4\text{-Zn}^{2+}$ ,  $\square$  = free **4**,  $\blacktriangledown$  =  $3\text{-Zn}^{2+}$ ,  $\nabla$  = free **3**.

## Characterization of complex $3\text{-Zn}^{2+}$ in $\text{D}_2\text{O}$

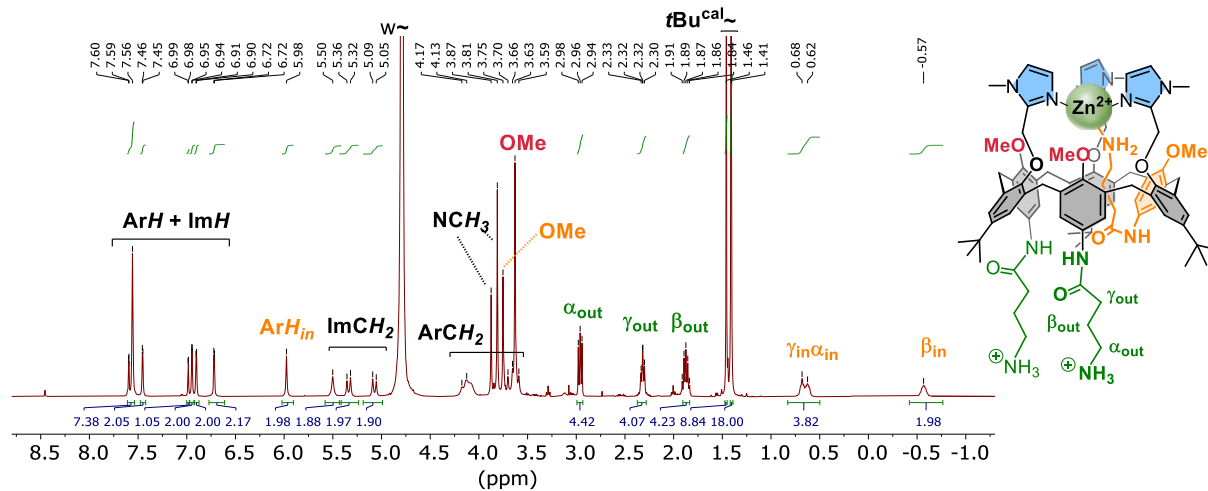

Figure S34.  $^1\text{H}$  NMR spectrum (298K, 400 MHz,  $\text{D}_2\text{O}$ ) of  $3\text{-Zn}^{2+}$  (5 mM). w: water.

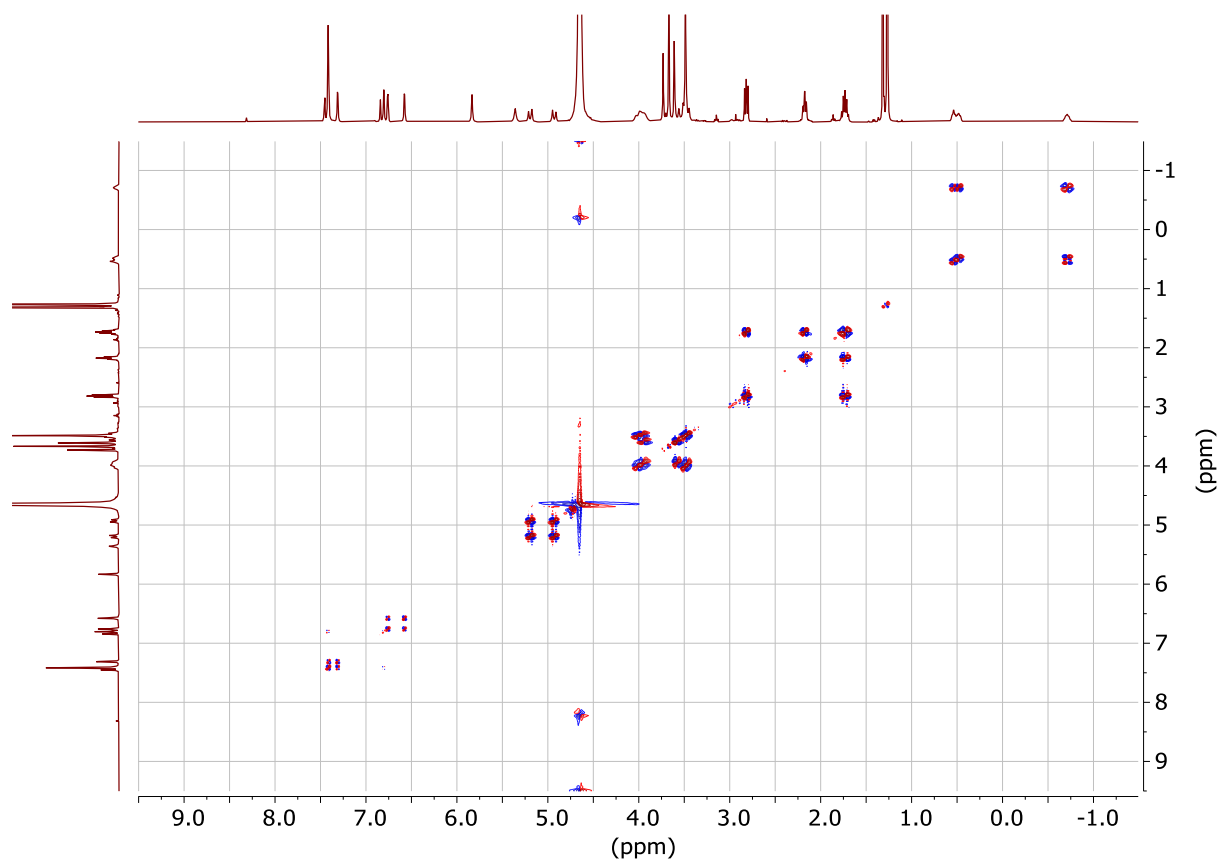

Figure S35. COSY NMR spectrum (298K, 400 MHz,  $\text{D}_2\text{O}$ ) of  $3\text{-Zn}^{2+}$  (5 mM).

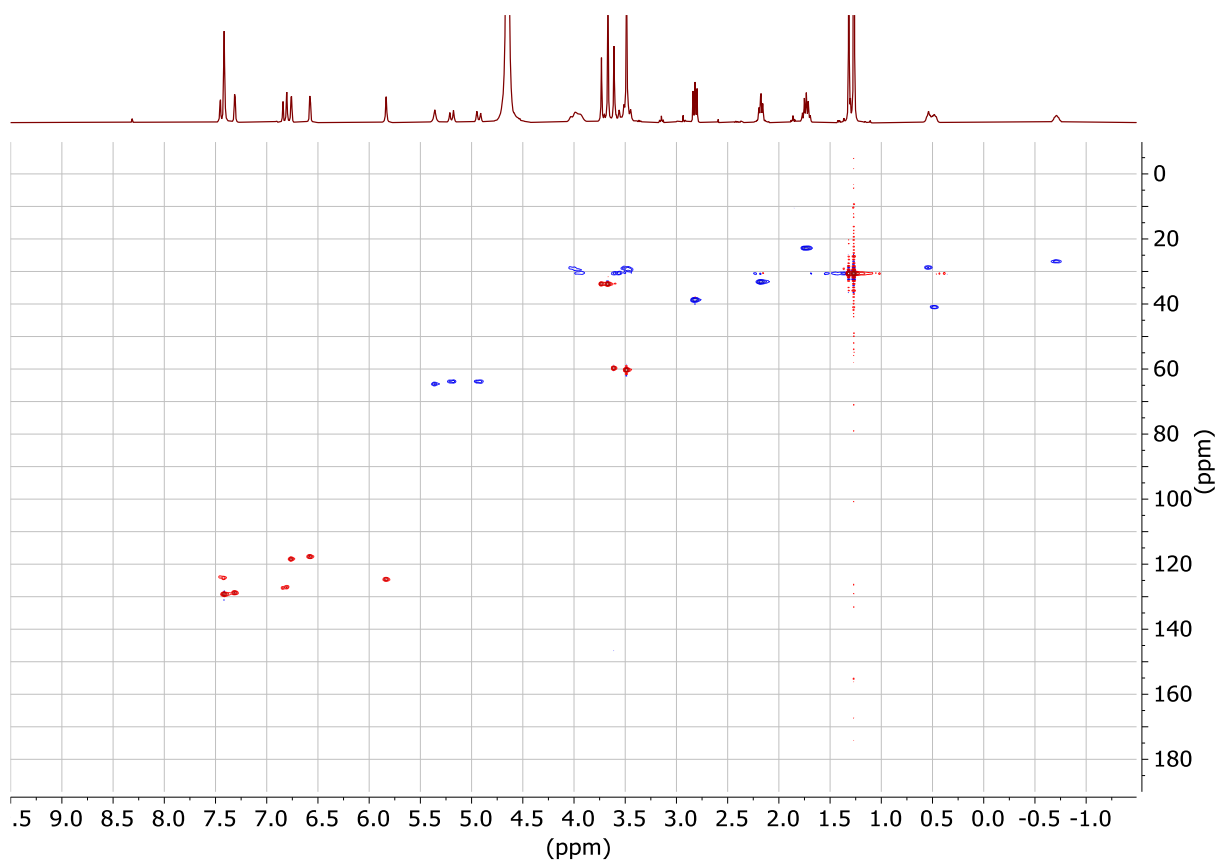

**Figure S36.** Edited HSQC NMR spectrum (298K, 400 MHz, D<sub>2</sub>O) of **3**-Zn<sup>2+</sup> (5 mM).

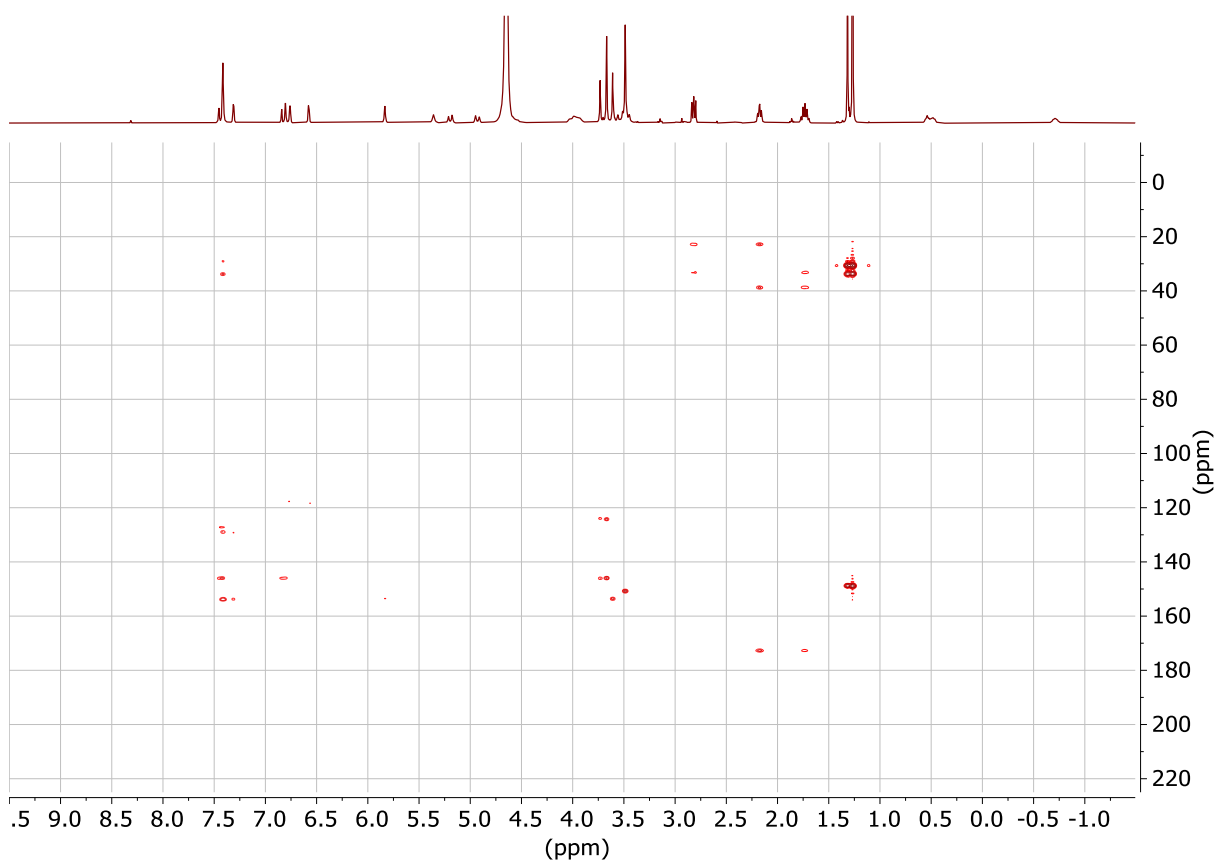

**Figure S37.** HMBC spectrum (298K, 400 MHz, D<sub>2</sub>O) of **3**-Zn<sup>2+</sup> (5 mM).

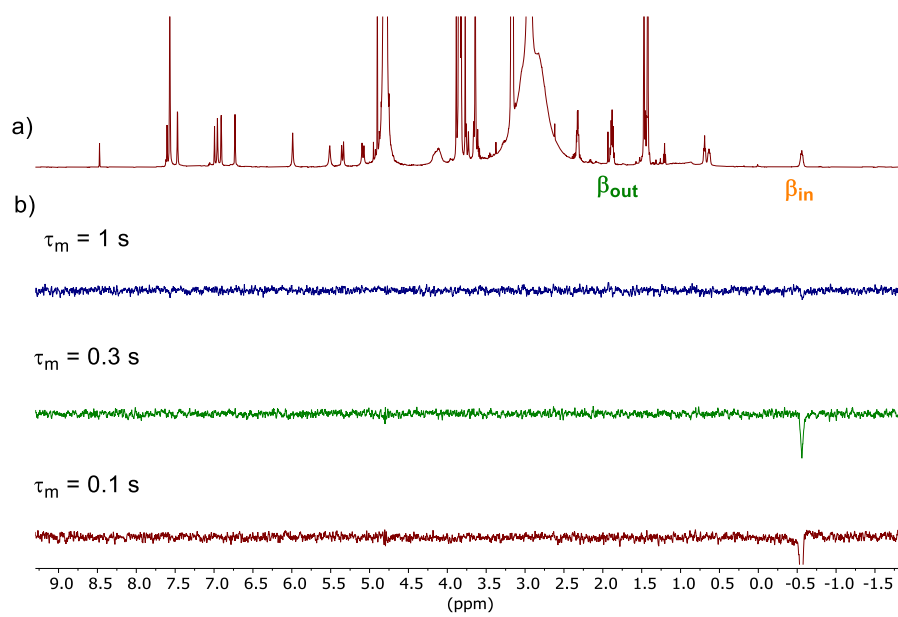

**Figure S38.**  $^1\text{H}$  NMR spectra (298 K, 600 MHz,  $\text{D}_2\text{O}$ ) of a)  $3\text{-Zn}^{2+}$ , b) 1D EXSY spectra (at various mixing times) after selective excitation of the  $\beta_{\text{in}}$  signal at  $-0.57$  ppm.



## Titration for the formation of the complexes in D<sub>2</sub>O

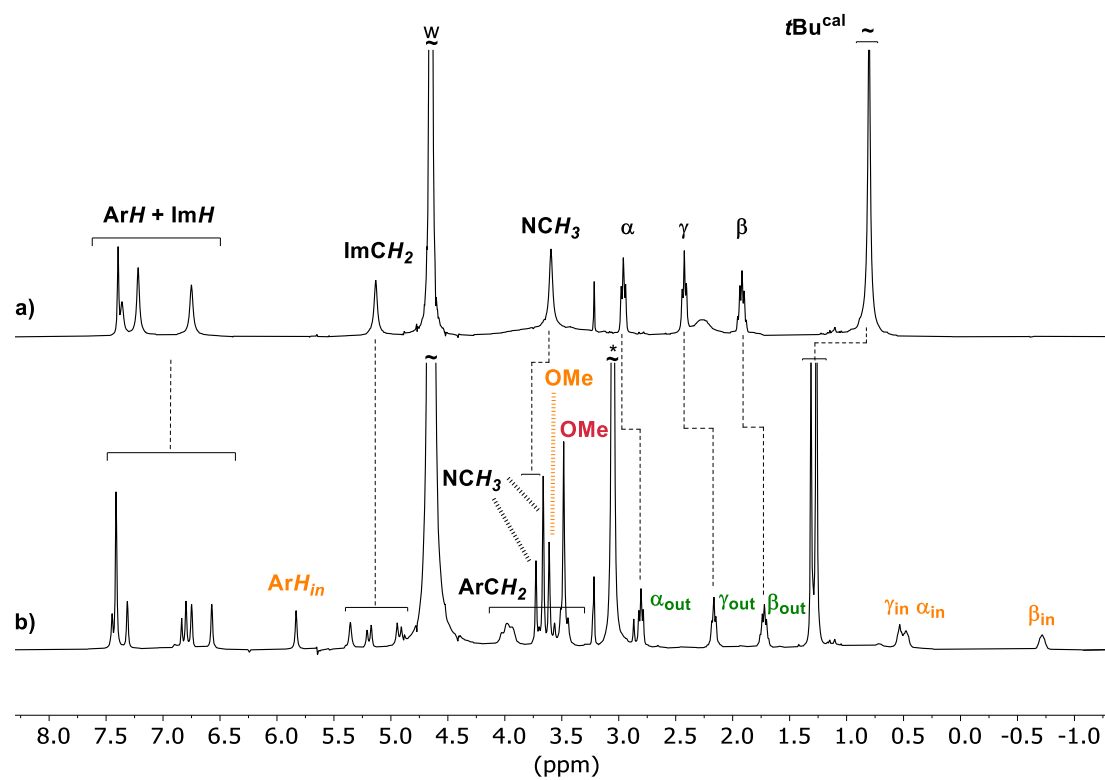

**Figure S39.** <sup>1</sup>H NMR spectra (298 K, 400 MHz, D<sub>2</sub>O) of a) **3** (1 mM) + ~1 equiv. of Zn(ClO<sub>4</sub>)<sub>2</sub> at pH = 3–4, b) **3** (1 mM) + ~1 equiv. of Zn(ClO<sub>4</sub>)<sub>2</sub> + TMAOH (pH = 7.8). \* = TMA<sup>+</sup>, w = water.

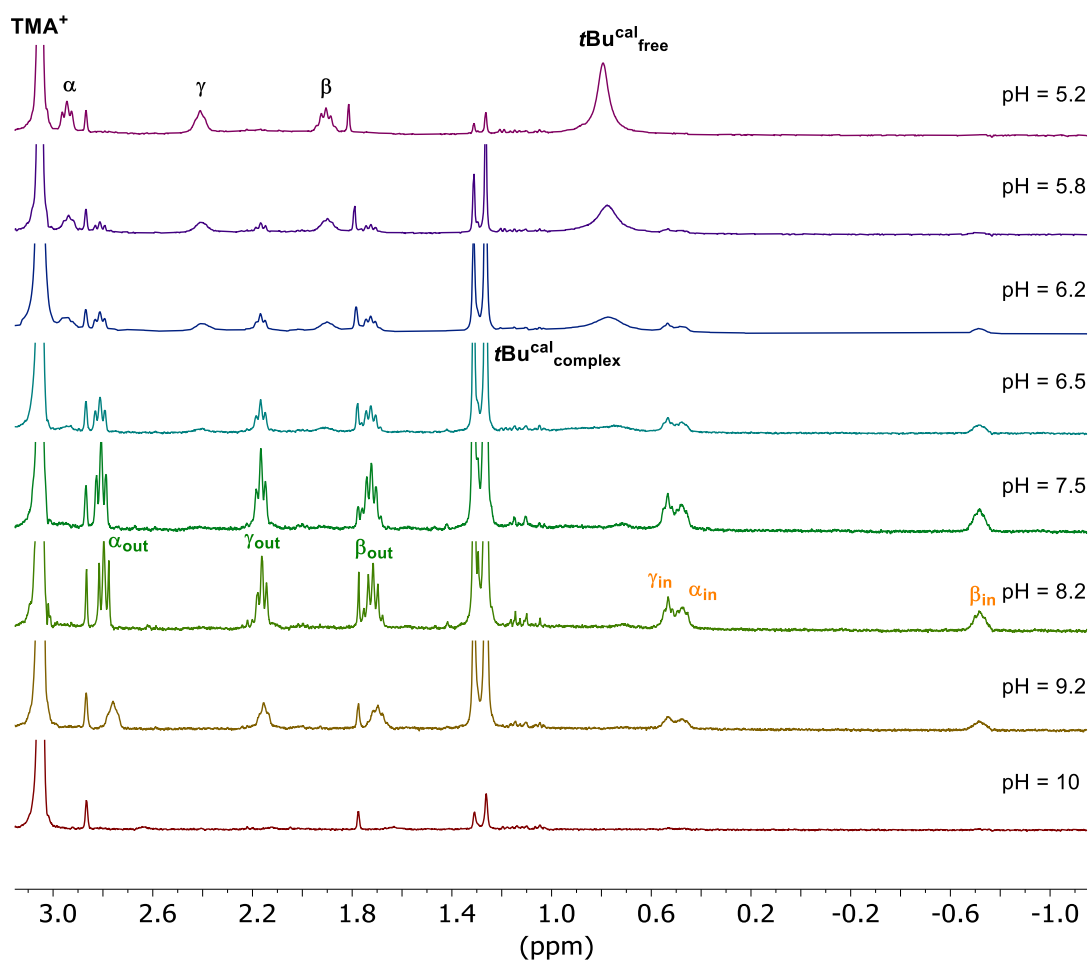

**Figure S40.** High field region of  $^1\text{H}$  NMR spectra (298 K, 400 MHz,  $\text{D}_2\text{O}$ ) of **3** (1 mM) +  $\sim 1$  equiv. of  $\text{Zn}(\text{ClO}_4)_2$  at various pH, changed by addition of TMAOH/HCl aliquots. At pH 9.2 and 10, a precipitate was observed in the NMR tube.

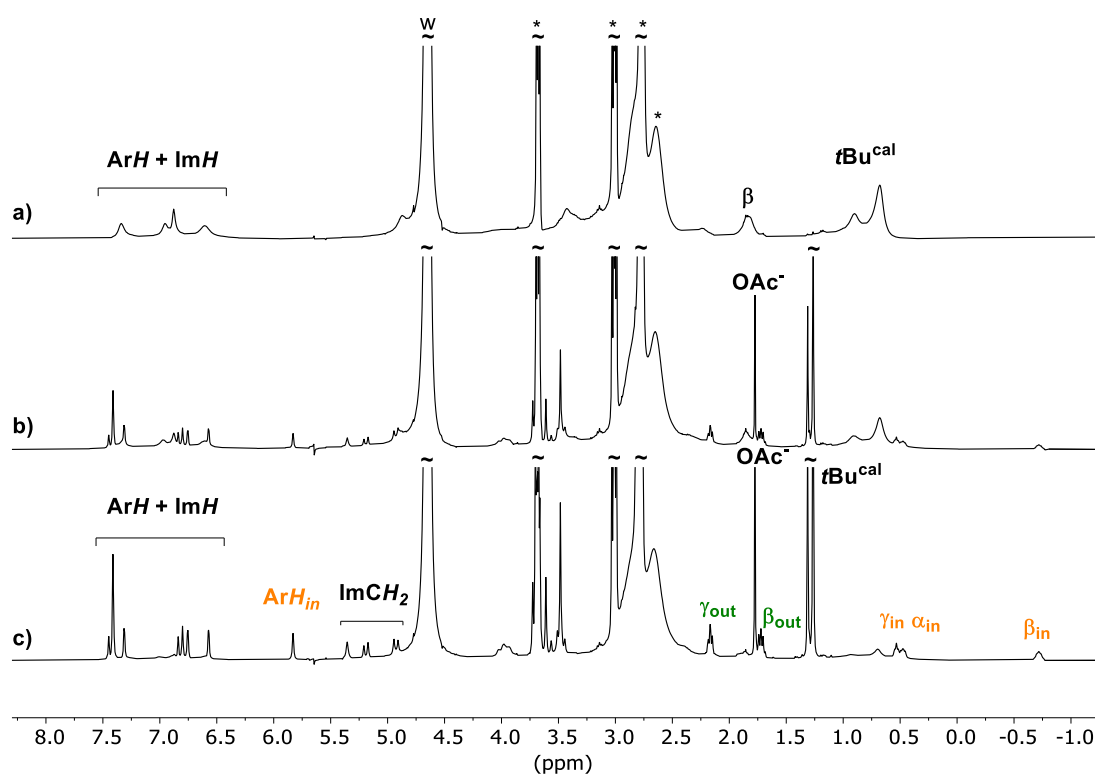

**Figure S41.**  $^1\text{H}$  NMR spectra (298 K, 400 MHz,  $\text{D}_2\text{O}$ ) of a) **3** (1 mM), b) **3** (1 mM) +  $\sim 0.4$  equiv. of  $\text{Zn}(\text{OAc})_2$ , b) **3** (1 mM) +  $\sim 1.1$  equiv. of  $\text{Zn}(\text{OAc})_2$ , all in HEPES 10 mM, pH 7.9. \* = HEPES signals, w = water.

The formation constants,  $K_a^{\text{eff}}$  and  $K'_a(\text{pH})$ , of the complex  $\mathbf{3} \cdot 2\text{H}^+ \cdot \text{Zn}^{2+}$  are defined according to equilibrium (1):

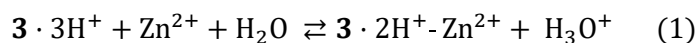

$$K_a^{\text{eff}} = \frac{[\mathbf{3} \cdot 2\text{H}^+ \cdot \text{Zn}^{2+}][\text{H}_3\text{O}^+]}{[\text{Zn}^{2+}][\mathbf{3} \cdot 3\text{H}^+]}$$

and

$$K'_a(\text{pH}) = \frac{[\mathbf{3} \cdot 2\text{H}^+ \cdot \text{Zn}^{2+}]}{[\text{Zn}^{2+}][\mathbf{3} \cdot 3\text{H}^+]}$$

From the two above spectra in Figure S41, the binding affinity  $K'_a(7.9)$  can be calculated by integration of the different signals of interests ( $\mathbf{3} \cdot 2\text{H}^+ \cdot \text{Zn}^{2+}$ ,  $\mathbf{3} \cdot 3\text{H}^+$  and  $\text{AcO}^-$ ). The  $^1\text{H}$  NMR signals of  $\mathbf{3} \cdot 3\text{H}^+$  being rather broad, the experimental error was estimated on a wide range.

Therefore,  $K'_a(7.9) = 42900$  and  $30700 \text{ M}^{-1}$  were determined respectively for spectra b and c. Taking in account the experimental error, we estimated  $\log K'_a(7.9) = 4.5 \pm 0.3$ .

Knowing the pH and therefore  $[\text{H}_3\text{O}^+]$ , we were able to calculate  $K_a^{\text{eff}} = 5.4 \cdot 10^{-4}$  and  $3.8 \cdot 10^{-4}$ . Therefore,  $\text{p}K_a^{\text{eff}} = 3.4 \pm 0.3$  as the pseudo- $\text{p}K_a$  of the amino leg.
